## **Global transcriptome analysis of *Aedes aegypti* mosquitoes in response to Zika virus infection**

Kayvan Etebari<sup>1</sup>, Shivanand Hegde<sup>2</sup>, Miguel A Saldaña<sup>3</sup>, Steven G Widen<sup>4</sup>, Thomas G Wood<sup>4</sup>, Sassan Asgari<sup>1#</sup>, Grant L Hughes<sup>5#</sup>.

<sup>1</sup>Australian Infectious Disease Research Centre, School of Biological Sciences, The University of Queensland, Brisbane, Australia

<sup>2</sup>Department of Pathology, University of Texas Medical Branch, Galveston, TX, USA

<sup>3</sup>Department of Microbiology and Immunology, University of Texas Medical Branch, Galveston, TX, USA

<sup>4</sup>Department of Biochemistry and Molecular Biology, University of Texas Medical Branch, Galveston, TX, USA

<sup>5</sup>Department of Pathology, Institute for Human Infections and Immunity, Center for Tropical Diseases, Center for Biodefense and Emerging Infectious Disease. University of Texas Medical Branch, Galveston, TX, USA

**Word counts:** Abstract+Importance (327); text (4196)

**Running title:** Transcriptional changes to Zika virus in mosquitoes

#Corresponding authors: Sassan Asgari – [s.asgari@uq.edu.edu](mailto:s.asgari@uq.edu.edu). Grant L Hughes [glhughes@utmb.edu](mailto:glhughes@utmb.edu).

## 1 **Abstract**

2 Zika virus (ZIKV) of the *Flaviviridae* family is a recently emerged mosquito-borne virus that  
3 has been implicated in the surge of the number of microcephaly instances in south  
4 America. The recent rapid spread of the virus led to its declaration as a global health  
5 emergency by the World Health Organization. The virus is transmitted mainly by the  
6 mosquito *Aedes aegypti* that also vectors dengue virus, however little is known about the  
7 interactions of the virus with the mosquito vector. In this study, we investigated the  
8 transcriptome profiles of whole *Ae. aegypti* mosquitoes in response to ZIKV infection at 2,  
9 7, and 14 days post-infection using RNA-Seq. Results showed changes in the abundance  
10 of a large number of transcripts at each time point following infection, with 18 transcripts  
11 commonly changed among the three time points. Gene ontology analysis revealed that  
12 most of the altered genes are involved in metabolic process, cellular process and  
13 proteolysis. In addition, 486 long intergenic non-coding RNAs were identified altered upon  
14 ZIKV infection. Further, we found correlational changes of a number of potential mRNA  
15 target genes with that of altered host microRNAs. The outcomes provide a basic  
16 understanding of *Ae. aegypti* responses to ZIKV and helps to determine host factors  
17 involved in replication or mosquito host anti-viral response against the virus.

## 18 **Importance**

19 Vector-borne viruses pose great risks on human health. Zika virus has recently emerged  
20 as a global threat, rapidly expanding its distribution. Understanding the interactions of the  
21 virus with mosquito vectors at the molecular level is vital for devising new approaches in  
22 inhibiting virus transmission. In this study, we embarked on analyzing the transcriptional  
23 response of *Aedes aegypti* mosquitoes to Zika virus infection. Results showed large  
24 changes both in coding and long non-coding RNAs. Analysis of these genes showed  
25 similarities with other flaviviruses, including dengue virus, which is transmitted by the same

26 mosquito vector. The outcomes provide a global picture of changes in the mosquito vector  
27 in response to Zika virus infection.

28 **Keywords:** *Aedes aegypti*; transcriptome; Zika virus; RNA-Seq; long non-coding RNA;  
29 microRNA; odorant binding protein; behavior

30

## 31 **Introduction**

32 Flaviviruses are a group of arthropod-borne viruses (arboviruses) that impose huge  
33 burdens on global animal and human health. The most known examples of flaviviruses  
34 that cause diseases in humans are yellow fever, West Nile, dengue and Zika viruses. Zika  
35 virus (ZIKV) has been the most recently emerged mosquito-borne virus. While it was first  
36 reported in 1952 from Uganda (1), the virus spread rapidly across the Pacific and the  
37 Americas in the last 10 years with recent outbreaks in South America (2). The clinical  
38 symptoms are variable, ranging from no or mild symptoms to severe neurological  
39 disorders such as microcephaly in infants born from infected mothers, or Guillain-Barré  
40 syndrome in adults (reviewed in (2, 3)). The virus is mainly transmitted among humans by  
41 the bites of mosquito species of the genus *Aedes*, in particular *Aedes aegypti*, when they  
42 take a blood meal from infected individuals. The virus first infects the midgut cells of the  
43 mosquito and then disseminates into other tissues, finally reaching the salivary glands  
44 where they continue to replicate and are eventually transmitted to other human hosts upon  
45 subsequent blood feeding events (4).

46 It is thought that infection by flaviviruses does not cause any detrimental pathological  
47 effects on the mosquito vectors (5), reflecting evolutionary adaptations of the viruses with  
48 mosquitoes through intricate interactions, which involve optimal utilization of host factors  
49 for replication and avoidance of overt antiviral responses. However, a number of studies  
50 have shown major transcriptomic changes in the mosquito vectors in response to flavivirus  
51 infection. These changes suggest regulation of a wide range of host genes involved in

52 classical immune pathways, RNA interference, metabolism, energy production and  
53 transport (6-13). In addition, mosquito small and long non-coding RNAs have also been  
54 shown to change upon flavivirus infection (14, 15).

55 Recently, we showed that the microRNA (miRNA) profile of *Ae. aegypti* mosquitoes is  
56 altered upon ZIKV infection at different time points following infection (16). Here, we  
57 describe the transcriptional response of *Ae. aegypti* whole mosquitoes to ZIKV infection at  
58 the same time points post-infection. Consistent with previous studies on other arboviruses,  
59 we found that the abundance of a large number of genes was altered following ZIKV  
60 infection.

## 61 **Results and Discussion**

### 62 ***Ae. aegypti* RNA-Seq data analysis**

63 RNA sequencing using Illumina sequencing technology was performed on poly(A)-  
64 enriched RNAs extracted from ZIKV-infected and non-infected *Ae. aegypti* mosquitoes at  
65 2, 7, and 14 days post-infection (dpi). Total numbers of clean paired reads varied between  
66 43,486,502 to 60,486,566 reads per library among the 18 sequenced RNA samples. More  
67 than 96% of reads mapped to the host genome with around 80% of counted fragments  
68 mapped to gene regions and 20% to intergenic areas of the genome (Table S1).

69 Principal component analysis (PCA) of the RNA-Seq data at each time point distributed all  
70 biological replicates of ZIKV-infected and non-infected samples in two distinct groups,  
71 although the differences were more subtle at 2 days post-infection, in which one of the  
72 ZIKV-infected biological replicates was relatively close to the control group (Fig. 1).

73 Analysis and comparison of mRNA expression profiles of *Ae. aegypti* mosquitoes at  
74 different time points following ZIKV infection revealed that in total 1332 genes had  
75 changes of 2-fold or more in either directions (Fig. 2 with details in Table S2). Among the  
76 three time points, the highest number of changes occurred at 7 dpi with 944 genes

77 showing alteration in their transcript levels. The numbers of genes altered at 2 and 14 dpi  
78 were very close, 298 and 303, respectively (Fig. 3). These trends were expected as we  
79 anticipated to see lower gene expression alteration at 2 dpi and 14 dpi due to low level of  
80 infection in the mosquito body at 2 dpi and advanced stages of virus replication at 14 dpi,  
81 while at 7 dpi the virus is still at its proliferative stage infecting various tissues of the  
82 mosquito. In a previous study that explored the effect of DENV-2 on *Ae. aegypti*  
83 transcriptome using RNA-Seq, the number of genes altered at 4 dpi was the highest (151  
84 combining carcass and midgut) as compared to 1 dpi that showed the lowest number of  
85 changes (40) followed by 14 dpi (82) (11).

86 Comparison of the transcriptome profiles showed 18 overlapping genes among the three  
87 time points (Fig. 3; listed in Table 1). Twelve of these common genes were depleted and  
88 only six were enriched, which were Angiotensin-converting enzyme (AAEL009310), serine-  
89 type endopeptidase (AAEL001693), phosphoglycerate dehydrogenase (AAEL005336),  
90 cysteine dioxygenase (AAEL007416) and two hypothetical proteins. To validate the  
91 analysis of the RNA-Seq data, we used RT-qPCR analysis of nine of the 18 genes.  
92 Overall, all genes showed consistency between the two methods in their trends of  
93 depletion or enrichment, except for four genes (AAEL013338, AAEL005090, AAEL012339,  
94 AAEL013602) the trend was the opposite but this only occurred at 7 dpi (Fig. 4).

### 95 **Differentially abundant transcripts and comparisons with other flaviviruses**

96 When concentrating on genes with 10-fold differential expression and statistical  
97 significance relative to control mosquitoes, 75, 41 and 16 genes showed changes at 2, 7  
98 and 14 dpi, respectively. After removing hypothetical proteins, those with known functions  
99 are listed in Table 2. Interestingly, while the total number of genes showing differential  
100 abundance was higher at 7 dpi (Fig. 3), more genes showed 10-fold or greater changes at  
101 2 dpi as compared with 7 dpi (74 versus 41).

102 At 2 dpi, transcripts of eight genes were enriched with a metalloproteinase (AAEL011539)

103 showing 56-fold increase in abundance, a serine protease (AAEL013298) increasing 22-  
104 fold, and two trypsins (AAEL007601 and AAEL013707) with 19 and 10-fold increases,  
105 respectively. We also saw that two phosphatidyl ethanolamine-binding proteins, two  
106 cubulin proteins, and a cysteine-rich venom protein were altered at this time point.  
107 However most strikingly, we observed suppression of 14 odorant binding proteins at 2 dpi  
108 with several of these transcripts being massively reduced (around 800-fold) (Table 2).  
109 Furthermore, other odorant binding protein transcripts were enhanced (by 2 fold or  
110 greater) at 7 and 14 dpi (Table S2), indicating that ZIKV may have the capacity to alter the  
111 behavior of the mosquito, potentially suppressing host-seeking in early stages of the  
112 infection and encouraging host-seeking when the mosquito is infectious. Dengue virus is  
113 known to alter host-seeking behaviors and feeding efficiency (17, 18), and microarray  
114 analysis of mosquitoes with salivary gland infections found several odorant binding protein  
115 transcripts that were enhanced in this late stage of infection (14 dpi) (19). Similarly, there  
116 is evidence that malaria parasites suppress the host-seeking tendencies of the mosquito  
117 early in infection but encourage host-seeking at later stages when the mosquito can  
118 transmit the parasite (20-22). The transcription patterns we observed here with ZIKV are  
119 consistent with these observations from dengue and malaria infection of mosquitoes but  
120 further studies are required to confirm this intriguing finding.

121 At 7 dpi, 34 genes showed enrichment of 10-fold or more including clip-domain serine  
122 proteases, defensins, transferrins, hexamerin, C-type lectin, and serine proteases, which  
123 are implicated in immune responses. At this time point, only seven genes were depleted.  
124 The number of genes that were differentially expressed by 10-fold or more at 14 dpi was  
125 small, with eight genes showing enrichment and eight genes showing depletion. The  
126 highest enrichment (212-fold) was steroid receptor RNA activator 1 (AAEL015052), while  
127 peritrophin, attacin and superoxide dismutase were among the depleted genes (Table 2).  
128 Previous studies have shown alteration of mRNA transcript levels in *Ae. aegypti*

129 mosquitoes infected with DENV and a couple of other flaviviruses. Using microarray  
130 analysis, Colpitts et al. found that 76 genes showed 5-fold or more changes in DENV-  
131 infected mosquitoes over 1, 2 and 7 dpi (13). Their study, which also included response of  
132 *Ae. aegypti* to West Nile virus (WNV) and Yellow fever virus (YFV), found commonly 20  
133 and 15 genes were differentially enriched and depleted, respectively, between the three  
134 flaviviruses at day 1 post-infection. Histone H3 (AAEL003685) that was enriched at all time  
135 points with WNV, YFV and DENV in *Ae. aegypti* (13) was not changed during ZIKV  
136 infection, except 2-fold depletion at 7 dpi. Consistent with Colpitts et al, Juvenile hormone-  
137 inducible protein (AAEL006607) was induced in ZIKV-infected mosquitoes but only at 7 dpi  
138 by 2-fold. A serine protease gene (AAEL006568) depleted by all three flaviviruses was  
139 also depleted by ZIKV infection by 2-folds at 2 dpi only. A matrix metalloprotease  
140 (AAEL00312) was highly depleted by DENV, WNV and YFV. Two matrix metalloproteases  
141 annotated in the new genome assembly (AAEL002672 and AAEL002665) did not change  
142 much in ZIKV-infected mosquitoes at 2 and 14 dpi, but were induced by 11.5 and 5.5-folds  
143 at 7 dpi. A pupal cuticle protein (AAEL011045) that was significantly depleted in the case  
144 of DENV, WNV and YFV, was enriched in ZIKV-infected mosquitoes by about 2-folds at 7  
145 and 14 dpi.

146 In a follow-up study using the data from the above study (13), Londono-Renteria et al.  
147 identified 20 top differentially regulated transcripts in YFV, DENV and WNV infected *Ae.*  
148 *aegypti* mosquitoes (23). Out of these 20 genes, five of them were also found changed in  
149 ZIKV-infected mosquitoes in our study. These were the cysteine-rich venom proteins  
150 (AAEL005098, AAEL005090, AAEL000379 and AAEL000356) by about 9, 18, 25 and 150-  
151 fold depletion at 2 dpi, and an unknown protein (AAEL013122) by 390-fold depletion at 2  
152 dpi. Another study also found a number of cysteine-rich venom proteins altered upon  
153 DENV infection of *Ae. aegypti* mosquitoes (11). Cysteine-rich venom proteins are  
154 secretory proteins that are mostly found in the fluids of animal venoms acting on ion

155 channels (24). Londono-Renteria et al. found that among the cysteine-rich venom proteins  
156 only AAEL000379 was enriched in DENV-infected mosquitoes and the rest did not change  
157 noticeably. Silencing the gene led to increase in replication of DENV (23). Alteration of the  
158 cysteine-rich venom proteins commonly found in the case of different flaviviruses indicates  
159 their possible importance in replication of these viruses. Further studies are required to  
160 determine the role these proteins play in ZIKV-infected mosquitoes specifically.

161 In another study with DENV-2 and *Ae. aegypti* in which deep sequencing of carcass,  
162 midgut and salivary glands were used, transcript levels of infected and non-infected  
163 tissues were compared at 1, 4 and 14 dpi, which showed differential abundance of 397  
164 genes (11). We reanalyzed the raw data from the study using the same pipeline as we  
165 used for our study. In total, 216 genes were found to be commonly altered between  
166 DENV-2 and ZIKV infections (Table S3). At 1 dpi, the highest enrichments of altered genes  
167 were related to immunity (holotricin, AAEL017536 and Defensin, AAEL003841), followed  
168 by metabolism (fatty acid synthase, AAEL001194 and malic enzyme, AAEL005790) (11).  
169 The two immune genes were also enriched in the case of ZIKV infection in this study, but  
170 only at 7 dpi (Table S2). The two metabolism related genes changed by about 2.5-fold  
171 only at 7 dpi in ZIKV-infected mosquitoes. In the midgut, 10 genes were enriched and 10  
172 were depleted in DENV-infected mosquitoes at 1 dpi as compared to control. Cecropin  
173 (AAEL017211) showed the highest depletion in the case of DENV infection, but this gene  
174 was not changed in ZIKV-infected mosquitoes in this study. The highest enriched  
175 transcripts in DENV-infected mosquito midguts were either associated with oxidoreductase  
176 and transport activities or functions unknown (11). A gene associated with transport  
177 (AAEL001503) was also changed in ZIKV-infected mosquitoes by about 2.5-fold only at 7  
178 dpi.

179 At 4 dpi, the transcript levels of 146 genes were altered in DENV-infected *Ae. aegypti* (11).  
180 The majority of genes at this time point were depleted in virus-infected samples as



181 compared to the control. These were mostly associated with immunity. Consistent with the  
182 DENV study, attacin, cathepsin, clip-domain serine proteases, a number of C-type lectins,  
183 defensin, fibrinogen and holotricin were also altered in ZIKV-infected mosquitoes (Table  
184 S2). Redox and metabolism associated genes cytochrome P450, and allantoinase were  
185 also among others that showed differential expression in ZIKV and DENV-infected  
186 mosquitoes.

187 At 14 dpi, commonly altered immune genes between DENV and ZIKV infections were C-  
188 type lectins and attacin. Enriched in 14 dpi by DENV, Histone H4 (AAEL003673,  
189 AAEL003689), Histone H2A (AAEL003669) were depleted by about 2.5-fold at 7 dpi in  
190 ZIKV-infected mosquitoes.

191 A number of immune-related genes were mostly enriched at 7 dpi in ZIKV-infected  
192 mosquitoes. Toll was enriched only at 7 dpi by 2-fold. Twelve leucine-rich immune proteins  
193 were mostly enriched at 7 dpi by 4-16 folds. Phenoloxidae (AAEL010919), which was not  
194 changed upon DENV infection, was depleted by 2-folds at 2 dpi but enriched by 8-9 folds  
195 at 7 and 14 dpi in ZIKV-infected mosquitoes. Components of the JAK/STAT pathway, such  
196 as Dome and Hop, were not induced in ZIKV-infected mosquitoes. Interestingly, induction  
197 of the JAK/STAT pathway specifically in the fat body of *Ae. aegypti* mosquitoes by  
198 overexpressing Dome or Hop did not lead to increased resistance to ZIKV infection (25).  
199 This result and lack of induction of the pathway in our study suggests that the JAK/STAT  
200 pathway may not be involved in ZIKV-mosquito interaction. Further, major genes involved  
201 in the RNAi pathway, such as Dicer-1, Dicer-2, or any of the Argonaut genes, also did not  
202 change upon ZIKV infection in this study.

### 203 **Gene Ontology**

204 All the differentially expressed host genes were submitted to Blast2Go for gene ontology  
205 (GO) analysis. This analysis identified 126, 68 and 33 GO terms in biological process,  
206 molecular function and cellular components, respectively (Table S4). GO analysis revealed

207 that the majority of differentially expressed genes in biological process category are  
208 involved in metabolic process, cellular process and proteolysis (Fig. 5). Binding and  
209 catalytic activity are two GO terms which showed significant enrichment among other  
210 terms in molecular function (Fig. 5). In *Ae. aegypti*, differentially expressed genes upon  
211 infection with DENV, WNV and YFV belonged to various cellular processes, such as  
212 metabolic processes, ion binding, peptidase activity and transport (13), which are also  
213 among the GO terms identified in differentially abundant transcripts in the ZIKV-infected  
214 mosquitoes (Fig. 5).

### 215 **microRNA target genes**

216 We screened all the differentially expressed mRNAs for the presence of potential  
217 microRNA (miRNA) binding sites. We identified 628 highly confident binding sites of 122  
218 *Ae. aegypti* miRNAs in 422 differentially expressed genes (Table S5). Only 77 binding  
219 sites are located in the 3'UTRs and 55 in the 5'UTR of these genes.

220 The output of three predictive tools revealed more than one binding site in 135  
221 differentially expressed genes. Cytochrome P450 (AAEL014019) harbors 10 binding sites  
222 in its sequence, Notch (AAEL008069) and Ubiquitin specific protease (AAEL011975) are  
223 two other genes with eight binding sites in their sequence. Considering all the examined  
224 *Ae. aegypti* miRNAs, miR-34-5p, miR-252-3p, miR-210-5p, miR-309a-3p and miR-2c-3p  
225 bind to multiple genes and have more than 20 binding sites. Recently, we identified *Ae.*  
226 *aegypti* miRNAs altered upon ZIKV infection at the same time points that RNA-Seq was  
227 conducted (2, 7 and 14 dpi) (16). Comparative analysis and mapping of the altered  
228 mRNAs and miRNAs with opposite trends in abundance revealed that 53 of the  
229 differentially expressed mRNAs could potentially be regulated by 11 differentially abundant  
230 miRNAs (Table S6). However, this is growing evidence that miRNAs could also positively  
231 regulate their target genes (26, 27), which are not listed in the table.

### 232 **Long intergenic non-coding RNAs (lincRNAs) change upon ZIKV infection**

233 lincRNAs are transcripts that are larger than 200 nt but do not code for any proteins,  
234 however, they are transcribed the same way as mRNAs (28); i.e. they have a poly-A tail  
235 and therefore enriched in transcriptomic data produced following mRNA isolation and  
236 sequencing. Similar to small non-coding RNAs, the main function of lincRNAs is regulation  
237 of gene expression, involved in various processes such as genomic imprinting and cell  
238 differentiation (29), epigenetic and non-epigenetic based gene regulation (30), activation  
239 and differentiation of immune cells (31), and relevantly virus-host interactions (32-36).  
240 We recently reported 3,482 putative lincRNAs from *Ae. aegypti* (32). In this study, we  
241 found that in total, 486 lincRNAs were differentially expressed in response to ZIKV  
242 infection in at least one time point post-infection (fold change, FC > 2 and P-value <0.05).  
243 Similar to mRNAs (see Fig. 3), the majority of altered lincRNAs were found at 7 dpi and 56  
244 out of these lincRNAs showed significant alteration at least in two time points (Table S7  
245 and Fig. 6). The Euclidean distance was calculated for each time point based on their  
246 lincRNA fold changes. Differentially expressed lincRNAs at 7 dpi (116.83) and 14 dpi  
247 (75.30) showed more correlation or similar FC pattern than those of 2 dpi (180.86). Only  
248 lincRNAs 656, 1385 and 3105 were differentially expressed and showed the same FC  
249 change pattern among the three time points. In our previous study, we also found that the  
250 transcript levels of 421 *Ae. aegypti* lincRNAs was altered due to DENV-2 infection.  
251 Comparison of those with the ones identified in this study showed that about 80 of them  
252 were also differentially expressed in ZIKV-infected samples (Table S7), which could be  
253 common lincRNAs involved in flavivirus-mosquito interactions.

## 254 **Conclusions**

255 Overall, our results showed large changes in the transcriptome of *Ae. aegypti* mosquitoes  
256 upon ZIKV infection, both in coding and long non-coding RNAs. The majority of  
257 transcriptional changes occurred at 7 dpi, with the genes mostly involved in metabolic  
258 process, cellular process and proteolysis. We found some overlaps of transcriptional

259 alterations in the case of other flavivirus infections in *Ae. aegypti*, but unlike those, immune  
260 genes were not altered to the same extent. In regards to lincRNAs, out of 486 lincRNAs  
261 changed in ZIKV-infected mosquitoes, 80 of them overlapped with that of DENV-infected  
262 mosquitoes indicating possible conserved functions of the lincRNAs in flavivirus-mosquito  
263 interactions. A drawback of this study is that we used whole mosquitoes, which means  
264 changes at the tissue levels could have been overlooked due to dilution factor by mixing  
265 all tissues; however, the outcomes provide a global overview of transcriptional response of  
266 *Ae. aegypti* to ZIKV infection, and can be utilized in determining potential pro and anti-viral  
267 host factors.

## 268 **Materials and Methods**

### 269 **Ethics Statement**

270 ZIKV, which was originally isolated from an *Ae. aegypti* mosquito (Chiapas State, Mexico),  
271 was obtained from the World Reference Center for Emerging Viruses and Arboviruses at  
272 the University of Texas Medical Branch (Galveston, TX, USA). Experimental work with the  
273 virus was approved by the University of Texas Medical Branch Institutional Biosafety  
274 Committee (Reference number: 2016055).

### 275 **Mosquito infections with Zika virus**

276 We used excess RNA from samples generated recently to investigate miRNA profiles in  
277 ZIKV-infected *Ae. aegypti* mosquitoes (16). Briefly, 4-6 day old female *Ae. aegypti*  
278 (Galveston strain) were orally infected with ZIKV (Mex 1-7 strain) at  $2 \times 10^5$  focus forming  
279 units (FFU)/ml in a sheep blood meal (Colorado Serum Company). Infected mosquitoes  
280 were collected at 2, 7 and 14 days post-infection (dpi) from which RNA was extracted  
281 using the mirVana RNA extraction kit (Life Technologies) applying the protocol for  
282 extraction of total RNA. Viral infection in mosquitoes was confirmed by Taqman qPCR on  
283 ABI StepOnePlus machine (Applied Biosystems) (16). For all time points, three

284 independent pools were used to create libraries for infected and uninfected samples.  
285 Uninfected mosquitoes were fed with ZIKV-free blood, collected at the same time points  
286 and processed as above.

### 287 **Library preparations and sequencing**

288 All samples were quantified using a Qubit fluorescent assay (Thermo Scientific). Total  
289 RNA quality was assessed using an RNA 6000 chip on an Agilent 2100 Bioanalyzer  
290 (Agilent Technologies).

291 Total RNA (1.0 µg) was poly A+ selected and fragmented using divalent cations and heat  
292 (94<sup>0</sup> C, 8 min). The NEBNext Ultra II RNA library kit (New England Biolabs) was used for  
293 RNA-Seq library construction. Fragmented poly A+ RNA samples were converted to cDNA  
294 by random primed synthesis using ProtoScript II reverse transcriptase (New England  
295 Biolabs). After second strand synthesis, the double-stranded DNAs were treated with T4  
296 DNA polymerase, 5' phosphorylated and then an adenine residue was added to the 3'  
297 ends of the DNA. Adapters were then ligated to the ends of these target template DNAs.  
298 After ligation, the template DNAs were amplified (5-9 cycles) using primers specific to each  
299 of the non-complimentary sequences in the adapters. This created a library of DNA  
300 templates that have non-homologous 5' and 3' ends. A qPCR analysis was performed to  
301 determine the template concentration of each library. Reference standards cloned from a  
302 HeLa S3 RNA-Seq library were used in the qPCR analysis. Cluster formation was  
303 performed using 15.5-17 billion templates per lane using the Illumina cBot v3 system.  
304 Sequencing by synthesis, paired end 50 base reads, was performed on an Illumina HiSeq  
305 1500 using a protocol recommended by the manufacturer.

### 306 **RNA-Seq data analysis**

307 The CLC Genomics Workbench version 10.1.1 was used for bioinformatics analyses in  
308 this study. RNA-Seq analysis was done by mapping next-generation sequencing reads,

309 distributing and counting the reads across genes and transcripts. The latest assembly of  
310 *Aedes aegypti* genome (GCF\_000004015.4) was used as reference. All libraries were  
311 trimmed from sequencing primers and adapter sequences. Low quality reads (quality  
312 score below 0.05) and reads with more than 2 ambiguous nucleotides were discarded.  
313 Clean reads were subjected to RNA-Seq analysis toolbox for mapping reads to the  
314 reference genome with mismatch, insertion and deletion cost of 2, 3 and 3, respectively.  
315 Mapping was performed with stringent criteria and allowed a length fraction of 0.8 in  
316 mapping parameter, which encounter at least 80% of nucleotides in a read must be  
317 aligned to the reference genome. The minimum similarity between the aligned region of  
318 the read and the reference sequence was set at 80%.

319 Principal Component Analysis (PCA) graphs were produced for each time point after ZIKV  
320 infection between control and infected samples to identify any outlying samples for quality  
321 control. The expression levels used as input were normalized log CPM (Count Per Million)  
322 values.

323 The relative expression levels were produced as RPKM (Reads Per Kilobase of exon  
324 model per Million mapped reads) values, which take into account the relative size of the  
325 transcripts and only uses the mapped-read datasets to determine relative transcript  
326 abundance. To explore genes with differential expression profile between two samples,  
327 CLC Genomic Workbench uses multi-factorial statistics based on a negative binomial  
328 Generalized Linear Model (GLM). Each gene is modeled by a separate GLM and this  
329 approach allows us to fit curves to expression values without assuming that the error on  
330 the values is normally distributed. TMM (Trimmed mean of M values) normalization  
331 method was applied on all data sets to calculate effective library sizes, which were then  
332 used as part of the per-sample normalization (37).

333 The Wald Test was also used to compare each sample against its control group to test  
334 whether a given coefficient is non-zero. We considered genes with more than 2-fold

335 change and false discovery rate (FDR) of less than 0.05 as statistically significantly  
336 modulated genes.

337 We previously reported 3,482 putative long intergenic non-coding RNAs (lincRNA) from  
338 *Ae. aegypti* (32). The expression profile of lincRNAs was also generated for each sample  
339 similar to the approach described above.

340 To identify the host transcriptomic response to two different flaviviruses, we compared  
341 altered gene profiles in previously published DENV-infected *Ae. aegypti* libraries (11) with  
342 our ZIKV infected samples. The relevant RNA-Seq data (SRA058076) were downloaded  
343 from NCBI sequence read archive. The libraries were treated in the same way as  
344 described above to identify differentially expressed *Ae. aegypti* gene profiles in response  
345 to DENV.

#### 346 **Gene Ontology (GO) analysis**

347 All differentially expressed genes were uploaded to Blast2GO server for functional  
348 annotation and GO analysis. We used Blast and InterProScan algorithms to reveal the GO  
349 terms of differentially expressed sequences. More abundant terms were computed for  
350 each category of molecular function, biological process and cellular components.  
351 Blast2GO has integrated the FatiGO package for statistical assessment and this package  
352 uses the Fisher's Exact Test.

#### 353 **Identification of miRNA target genes**

354 We screened all differentially expressed mRNAs to identify potential miRNA targets among  
355 them. If selected mRNAs do not have complete annotation such as clear 5'UTR, ORF and  
356 3'UTR, the region before ORF start codon (300 bp) and after stop codon (500 bp) for each  
357 mRNA was considered as 5'UTR and 3'UTR, respectively. We used three different  
358 algorithms including RNA22 (38), miRanda (39) and RNAhybrid (40) to predict potential  
359 miRNA binding sites on genes altered by ZIKV. We previously described this approach  
360 and parameters for setting each tool, but to increase the level of confidence, we selected

361 those binding sites which were predicted by all the three algorithms for further analysis  
362 (41).

### 363 **RT-qPCR analysis of mRNAs**

364 RNA was isolated as described previously (16). RNA from ZIKV positive samples was  
365 pooled (N = 5) for time points 2, 7, and 14 dpi and treated with amplification grade DNase I  
366 (Invitrogen). Total RNA was reverse transcribed using the amfiRivert cDNA Synthesis  
367 Platinum master mix (GenDEPOT, Barker, TX, USA) containing a mixture of oligo dT<sub>(18)</sub>  
368 and random hexamers. Real-time quantification was performed in StepOnePlus instrument  
369 (Applied Biosystems, Foster City, California, United States) in 10 µl reaction containing  
370 1:10 diluted cDNA template, 1X PowerUp SYBR Green Master Mix (Applied Biosystems),  
371 1µM each primer. The analysis was performed using  $\Delta\Delta C_t$  (Livak) method (42). Three  
372 independent biological replicates were conducted and all PCRs were performed in  
373 duplicates. The ribosomal protein S7 gene (43) was used for normalization of cDNA  
374 templates. Primer sequences are listed in Table S8.

### 375 **Accession number**

376 The accession number for the raw and trimmed sequencing data reported here is GEO:  
377 GSEXXXXX.

### 378 **Acknowledgements**

379 This project was supported by a NIH grant (R21AI124452) and a University of Texas  
380 Rising Star award to GLH, and an Australian Research Council (DP150101782) and an  
381 Australian Infectious Disease Research Centre grant to SA. GLH is additionally supported  
382 by the Western Gulf Center of Excellence for Vector-borne Diseases (CDC grant CK17-  
383 005). MAS was supported by a NIH T32 fellowship.

384 *Author contributions:* conceptualization, S.A., and G.L.H; Investigation: K.E., S.H., M.A.S.,  
385 S.G.W., and T.G.W.; Data curation: K.E.; Formal analysis: K.E., and S.A.; Writing-original



386 draft: K.E., and S.A.; Writing-review & editing: S.A., and G.L.H.; Supervision: S.A., and  
387 G.L.H.

## 388 References

- 389 1. Dick GW, Kitchen SF, Haddow AJ. 1952. Zika virus. I. Isolations and serological  
390 specificity. *Trans R Soc Trop Med Hyg* 46:509-520.
- 391 2. Song BH, Yun SI, Woolley M, Lee YM. 2017. Zika virus: History, epidemiology,  
392 transmission, and clinical presentation. *J Neuroimmunol* 308:50-64.
- 393 3. Miner JJ, Diamond MS. 2017. Zika virus pathogenesis and tissue tropism. *Cell Host*  
394 *Microbe* 21:134-142.
- 395 4. Weaver SC, Costa F, Garcia-Blanco MA, Ko AI, Ribeiro GS, Saade G, Shi PY,  
396 Vasilakis N. 2016. Zika virus: History, emergence, biology, and prospects for  
397 control. *Antiviral Res* 130:69-80.
- 398 5. Blair CD, Olson KE. 2014. Mosquito immune responses to arbovirus infections. *Curr*  
399 *Opin Insect Sci* 3:22-29.
- 400 6. Xi Z, Ramirez JL, Dimopoulos G. 2008. The *Aedes aegypti* Toll pathway controls  
401 dengue virus infection. *PLoS Pathog* 4:e1000098.
- 402 7. Sanchez-Vargas I, Scott J, Poole-Smith B, Franz A, Barbosa-Solomieu V, Wilusz J,  
403 Olson K, Blair C. 2009. Dengue virus type 2 infections of *Aedes aegypti* are  
404 modulated by the mosquito's RNA interference pathway. *PLoS Pathog* 5:e1000299.
- 405 8. Sim S, Dimopoulos G. 2010. Dengue virus inhibits immune responses in *Aedes*  
406 *aegypti* cells. *PLoS One* 5:e10678.
- 407 9. Tchankouo-Nguetcheu S, Khun H, Pincet L, Roux P, Bahut M, Huerre M, Guette C,  
408 Choumet V. 2010. Differential protein modulation in midguts of *Aedes aegypti*  
409 infected with chikungunya and dengue 2 viruses. *PLoS One* 5.
- 410 10. Behura SK, Gomez-Machorro C, Harker BW, deBruyn B, Lovin DD, Hemme RR,  
411 Mori A, Romero-Severson J, Severson DW. 2011. Global cross-talk of genes of the  
412 mosquito *Aedes aegypti* in response to dengue virus infection. *PLoS Negl Trop Dis*  
413 5:e1385.
- 414 11. Bonizzoni M, Dunn W, Campbell C, Olson K, Marinotti O, James A. 2012. Complex  
415 modulation of the *Aedes aegypti* transcriptome in response to dengue virus  
416 infection. *PLoS One* 7:e50512.
- 417 12. Chauhan C, Behura SK, DeBruyn B, Lovin DD, Harker BW, Gomez-Machorro C,  
418 Mori A, Romero-Severson J, Severson DW. 2012. Comparative expression profiles  
419 of midgut genes in dengue virus refractory and susceptible *Aedes aegypti* across  
420 critical period for virus infection. *PLoS One* 7:e47350.
- 421 13. Colpitts TM, Cox J, Vanlandingham DL, Feitosa FM, Cheng G, Kurscheid S, Wang  
422 P, Krishnan MN, Higgs S, Fikrig E. 2011. Alterations in the *Aedes aegypti*  
423 transcriptome during infection with West Nile, Dengue and Yellow fever viruses.  
424 *PLoS Pathog* 7:e1002189.
- 425 14. Campbell CL, Black WCt, Hess AM, Foy BD. 2008. Comparative genomics of small  
426 RNA regulatory pathway components in vector mosquitoes. *BMC Genomics* 9:425.
- 427 15. Etebari K, Osei-Amo S, Blomberg S, Asgari S. 2015. Dengue virus infection alters  
428 post-transcriptional modification of microRNAs in the mosquito vector *Aedes*  
429 *aegypti*. *Sci Rep* 5:15968.
- 430 16. Saldaña MA, Etebari K, Hart CE, Widen SG, Wood TG, Thangamani S, Asgari S,  
431 Hughes GL. 2017. Zika virus alters the microRNA expression profile and elicits an  
432 RNAi response in *Aedes aegypti* mosquitoes. *PLoS Neg Trop Dis* 11:e0005760.

- 433 17. Maciel-de-Freitas R, Sylvestre G, Gandini M, Koella JC. 2013. The influence of  
434 dengue virus serotype-2 infection on *Aedes aegypti* (Diptera: Culicidae) motivation  
435 and avidity to blood feed. PLoS One 8:e65252.
- 436 18. Sylvestre G, Gandini M, Maciel-de-Freitas R. 2013. Age-dependent effects of oral  
437 infection with dengue virus on *Aedes aegypti* (Diptera: Culicidae) feeding behavior,  
438 survival, oviposition success and fecundity. PLoS One 8:e59933.
- 439 19. Sim S, Ramirez JL, Dimopoulos G. 2012. Dengue virus infection of the *Aedes*  
440 *aegypti* salivary gland and chemosensory apparatus induces genes that modulate  
441 infection and blood-feeding behavior. PLoS Pathog 8:e1002631.
- 442 20. Murdock CC, Luckhart S, Cator LJ. 2017. Immunity, host physiology, and behaviour  
443 in infected vectors. Curr Opin Insect Sci 20:28-33.
- 444 21. Cator LJ, George J, Blanford S, Murdock CC, Baker TC, Read AF, Thomas MB.  
445 2013. 'Manipulation' without the parasite: altered feeding behaviour of mosquitoes is  
446 not dependent on infection with malaria parasites. Proc Biol Sci 280:20130711.
- 447 22. Cator LJ, Lynch PA, Read AF, Thomas MB. 2012. Do malaria parasites manipulate  
448 mosquitoes? Trends Parasitol 28:466-70.
- 449 23. Londono-Renteria B, Troupin A, Conway MJ, Vesely D, Ledizet M, Roundy CM,  
450 Cloherty E, Jameson S, Vanlandingham D, Higgs S, Fikrig E, Colpitts TM. 2015.  
451 Dengue virus infection of *Aedes aegypti* requires a putative cysteine rich venom  
452 protein. PLoS Pathog 11:e1005202.
- 453 24. Gibbs GM, O'Bryan MK. 2007. Cysteine rich secretory proteins in reproduction and  
454 venom. Soc Reprod Fertil Suppl 65:261-267.
- 455 25. Jupatanakul N, Sim S, Anglero-Rodriguez YI, Souza-Neto J, Das S, Poti KE, Rossi  
456 SL, Bergren N, Vasilakis N, Dimopoulos G. 2017. Engineered *Aedes aegypti*  
457 JAK/STAT pathway-mediated immunity to dengue virus. PLoS Negl Trop Dis  
458 11:e0005187.
- 459 26. Vasudevan S. 2012. Posttranscriptional upregulation by microRNAs. RNA 3:311-  
460 330.
- 461 27. Vasudevan S, Tong Y, Steitz JA. 2007. Switching from repression to activation:  
462 microRNAs can up-regulate translation. Science 318:1931-1934.
- 463 28. Clark MB, Mattick JS. 2011. Long noncoding RNAs in cell biology. Semin Cell Dev  
464 Biol 22:366-376.
- 465 29. Bonasio R, Shiekhattar R. 2014. Regulation of transcription by long noncoding  
466 RNAs. Annu Rev Genet 48:433-455.
- 467 30. Mercer TR, Dinger ME, Mattick JS. 2009. Long non-coding RNAs: insights into  
468 functions. Nat Rev Genet 10:155-159.
- 469 31. Fitzgerald KA, Caffrey DR. 2014. Long noncoding RNAs in innate and adaptive  
470 immunity. Curr Opin Immunol 26:140-146.
- 471 32. Etebari K, Asad S, Zhang G, Asgari S. 2016. Identification of *Aedes aegypti* long  
472 intergenic non-coding RNAs and their association with *Wolbachia* and dengue virus  
473 infection. PLoS Negl Trop Dis 10:e0005069.
- 474 33. Lakhota SC. 2012. Long non-coding RNAs coordinate cellular responses to stress.  
475 RNA 3:779-796.
- 476 34. Mizutani R, Wakamatsu A, Tanaka N, Yoshida H, Tochigi N, Suzuki Y, Oonishi T,  
477 Tani H, Tano K, Ijiri K, Isogai T, Akimitsu N. 2012. Identification and  
478 characterization of novel genotoxic stress-inducible nuclear long noncoding RNAs  
479 in mammalian cells. PLoS One 7:e34949.
- 480 35. Tani H, Onuma Y, Ito Y, Torimura M. 2014. Long non-coding RNAs as surrogate  
481 indicators for chemical stress responses in human-induced pluripotent stem cells.  
482 PLoS One 9:e106282.

- 483 36. Winterling C, Koch M, Koepfel M, Garcia-Alcalde F, Karlas A, Meyer TF. 2014.  
484 Evidence for a crucial role of a host non-coding RNA in influenza A virus replication.  
485 RNA Biol 11:66-75.
- 486 37. Robinson M, Oshlack A. 2010. A scaling normalization method for differential  
487 expression analysis of RNA-seq data. Genome Biol 11:R25.
- 488 38. Miranda KC, Huynh T, Tay Y, Ang Y-S, Tam W-L, Thomson AM, Lim B, Rigoutsos  
489 I. 2006. A pattern-based method for the identification of microRNA binding sites and  
490 their corresponding heteroduplexes. Cell 126:1203-1217.
- 491 39. Enright AJ, John B, Gaul U, Tuschl T, Sander C, Marks DS. 2003. MicroRNA  
492 targets in *Drosophila*. Genome Biol 5:R1.
- 493 40. Krueger J, Rehmsmeier M. 2006. RNAhybrid: microRNA target prediction easy, fast  
494 and flexible. Nucleic Acids Res 34:W451-W454.
- 495 41. Etebari K, Asgari S. 2016. Revised annotation of *Plutella xylostella* microRNAs and  
496 their genome-wide target identification. Insect Mol Biol 25:788-799.
- 497 42. Liu Y, Zhou Y, Wu J, Zheng P, Li Y, Zheng X, Puthiyakunnon S, Tu Z, Chen X.  
498 2015. The expression profile of *Aedes albopictus* miRNAs is altered by dengue  
499 virus serotype-2 infection. Cell Biosci 5:16.
- 500 43. Isoe J, Collins J, Badgandi H, Day WA, Miesfeld RL. 2011. Defects in coatamer  
501 protein I (COPI) transport cause blood feeding-induced mortality in Yellow Fever  
502 mosquitoes. Proc Natl Acad Sci USA 108:E211-7.  
503

504 **Figure legends**

505 **Figure 1.** The principal component analysis of the effect of ZIKV infection on *Ae. aegypti*  
506 transcriptome at three different time points post-infection. The normalized log CPM (Count  
507 Per Million) used as expression value in this analysis.

508 **Figure 2.** Volcano plot analysis. Red circles indicate differentially expressed mRNAs in  
509 response to ZIKV infection (Fold change > 2 and FDR < 0.05).

510 **Figure 3.** Venn diagram representing the number of differentially expressed coding genes  
511 at three different time points post ZIKV infection. Profound alteration in gene expression  
512 was observed at 7 dpi and more common differentially expressed genes were found  
513 between day 7 and 14 samples.

514 **Figure 4.** Validation of RNA-Seq data analysis by RT-qPCR. Overall, all genes showed  
515 consistency between the two methods in their trends of depletion or enrichment, except for  
516 four genes (AAEL013338, AAEL005090, AAEL012339, AAEL013602) the trend was the  
517 opposite only at 7 dpi.

518 **Figure 5.** GO term enrichment analysis of differentially expressed genes in response to  
519 ZIKV infection in three categories of biological process, molecular function, and cellular  
520 component.

521 **Figure 6.** Venn diagram representing the number of differentially expressed lincRNAs at  
522 three different time points post ZIKV infection (FC > 2 and P-value <0.05). The majority of  
523 altered lincRNAs were found at 7 dpi and 56 out of these lincRNAs showed significant  
524 alteration at least at two time points.

**Table 1.** List of *Ae. aegypti* differentially expressed genes common to all the three time points post ZIKV infection.

| Gene ID    | Gene Description                                 | Fold change<br>(Day 2) | FDR<br>p-value | Fold change<br>(Day 7) | FDR<br>p-value | Fold change<br>(Day 14) | FDR<br>p-value |
|------------|--------------------------------------------------|------------------------|----------------|------------------------|----------------|-------------------------|----------------|
| AAEL009310 | Angiotensin-converting enzyme                    | 5.41                   | 3.66E-08       | 3.18                   | 4.61E-04       | 2.65                    | 4.81E-03       |
| AAEL001693 | Serine-type endopeptidase                        | 4.08                   | 8.02E-05       | 2.33                   | 4.74E-03       | 2.46                    | 3.81E-03       |
| AAEL005336 | D-3-phosphoglycerate dehydrogenase               | 2.06                   | 0.02           | 2.81                   | 3.00E-09       | 2.15                    | 1.66E-03       |
| AAEL010153 | Protein bicaudal C                               | -2.59                  | 9.34E-03       | -2.81                  | 0              | -3.08                   | 8.26E-13       |
| AAEL003688 | Conserved hypothetical protein                   | -2.21                  | 3.40E-03       | -2.13                  | 5.98E-12       | -2.23                   | 3.00E-08       |
| AAEL005501 | B-box type zinc finger protein ncl-1             | -2.87                  | 4.86E-05       | -2.13                  | 5.55E-10       | -2.6                    | 1.72E-06       |
| AAEL017329 | B-box type zinc finger protein ncl-1             | -2.52                  | 6.34E-04       | -2.14                  | 8.32E-08       | -2.44                   | 9.77E-09       |
| AAEL005850 | Hormone receptor-like in 4 (nuclear receptor)    | -2.57                  | 8.90E-04       | -2.75                  | 3.66E-13       | -3.06                   | 1.23E-08       |
| AAEL007416 | Cysteine dioxygenase                             | 3.12                   | 7.28E-03       | 2.37                   | 0.02           | 4.52                    | 5.85E-08       |
| AAEL010086 | DNA replication licensing factor MCM4            | -2.2                   | 5.94E-03       | -2.15                  | 2.33E-10       | -2.4                    | 1.90E-07       |
| AAEL010228 | Conserved hypothetical protein                   | 2.54                   | 0.03           | 6.45                   | 1.29E-09       | 3.12                    | 3.10E-06       |
| AAEL010644 | Ribonucleoside-diphosphate reductase large chain | -2.3                   | 0.03           | -2.62                  | 0              | -2.28                   | 5.52E-07       |
| AAEL011811 | DNA replication licensing factor MCM3            | -2.03                  | 8.63E-03       | -2.37                  | 0              | -2.21                   | 1.90E-07       |
| AAEL012339 | Cdk1                                             | -2                     | 4.40E-03       | -2.58                  | 1.05E-07       | -2.82                   | 5.07E-08       |
| AAEL013338 | Lethal (2) essential for life protein, l2efl     | -2.78                  | 5.28E-05       | -3.3                   | 0              | -2.38                   | 8.43E-08       |
| AAEL013577 | Conserved hypothetical protein                   | 3.7                    | 5.81E-04       | 2.81                   | 0.02           | 7.57                    | 2.13E-06       |
| AAEL013602 | Laminin gamma-3 chain                            | -2.31                  | 6.85E-03       | -2.03                  | 2.80E-03       | -2.29                   | 4.66E-04       |
| AAEL003797 | Hypothetical protein                             | -2.82                  | 4.43E-03       | -3.12                  | 9.61E-11       | -2.18                   | 2.47E-03       |

**Table 2.** List of *Ae. aegypti* differentially expressed genes with more than 10-fold change at each time point (in bold) post ZIKV infection.

| Name       | Gene ID | Description                                         | Fold change    |               |          |
|------------|---------|-----------------------------------------------------|----------------|---------------|----------|
|            |         |                                                     | Day 2          | Day 7         | Day 14   |
| AAEL011539 | 5574950 | metalloproteinase, putative                         | <b>56.2</b>    | -1.1          | 3.31     |
| AAEL013298 | 5577578 | serine protease, putative                           | <b>22.08</b>   | 1.86          | 4.74     |
| AAEL007601 | 5569396 | trypsin 5G1-like                                    | <b>18.98</b>   | 3.46          | 3.06     |
| AAEL013707 | 5578506 | trypsin 5G1-like                                    | <b>10.07</b>   | 6.24          | 1.81     |
| AAEL011260 | 5574623 | protein D3                                          | <b>-10.95</b>  | 3.1           | -0.18    |
| AAEL011954 | 5575620 | elongation of very long chain fatty acids protein 7 | <b>-11.96</b>  | 1.56          | 1.14     |
| AAEL014312 | 5564093 | cubilin homolog                                     | <b>-12.1</b>   | 8.42          | 1.87     |
| AAEL010965 | 5574152 | cubilin homolog                                     | <b>-12.49</b>  | 1.4           | -1.61    |
| AAEL010139 | 5572918 | putative defense protein 1                          | <b>-14.85</b>  | 34.42         | 0.9      |
| AAEL003094 | 5577074 | glycoprotein, putative                              | <b>-16.59</b>  | 6.43          | -1.29    |
| AAEL011491 | 5574891 | general odorant-binding protein 67                  | <b>-17.05</b>  | -2.93         | 0.46     |
| AAEL001487 | 5570904 | general odorant-binding protein 45-like             | <b>-17.49</b>  | -             | 2.66     |
| AAEL004947 | 5565723 | elongation of very long chain fatty acids protein 4 | <b>-18.74</b>  | -2.25         | 5.11E-03 |
| AAEL005090 | 5565985 | cysteine-rich venom protein, putative               | <b>-18.75</b>  | 3.74          | -        |
| AAEL010875 | 5574034 | general odorant-binding protein 45-like             | <b>-20.22</b>  | -             | -        |
| AAEL007096 | 5568731 | major royal jelly protein 3                         | <b>-21.97</b>  | 1.01          | 0.67     |
| AAEL010848 | 5574004 | major royal jelly protein 5                         | <b>-23.73</b>  | 1.45          | -0.67    |
| AAEL010872 | 5574030 | general odorant-binding protein 45-like             | <b>-27.81</b>  | -8.89         | 0.38     |
| AAEL011808 | 5575404 | glucose dehydrogenase [FAD, quinone                 | <b>-29.51</b>  | -1.01         | 3.95E-03 |
| AAEL006398 | 5567938 | OBP32: odorant binding protein OBP32                | <b>-31.43</b>  | 1.71          | -        |
| AAEL006393 | 5567943 | OBP28: odorant binding protein OBP28                | <b>-35.93</b>  | -6.24         | -        |
| AAEL005925 | 5567269 | geranylgeranyl pyrophosphate synthase               | <b>-38.51</b>  | 3.74          | 2.96E-03 |
| AAEL006396 | 5567937 | OBP31: odorant binding protein OBP31                | <b>-56.46</b>  | -3.6          | -1.31    |
| AAEL003511 | 5578352 | general odorant-binding protein 45-like             | <b>-59.39</b>  | -1.75         | 0.79     |
| AAEL015262 | 5566792 | phosphatidylethanolamine-binding protein, putative  | <b>-59.59</b>  | 1.4           | 0.56     |
| AAEL000796 | 5566894 | general odorant-binding protein 45-like             | <b>-302.47</b> | 3.74          | 2.66     |
| AAEL015052 | 5566038 | steroid receptor RNA activator 1                    | <b>-358.45</b> | 3.11          | 7.73     |
| AAEL000827 | 5566899 | general odorant-binding protein 45-like             | <b>-362.89</b> | -1.75         | -        |
| AAEL000846 | 5566895 | general odorant-binding protein 45-like             | <b>-397.26</b> | 2.42          | 0.51     |
| AAEL000833 | 5566896 | general odorant-binding protein 45-like             | <b>-739.97</b> | 2.42          | 1.27     |
| AAEL000835 | 5566905 | general odorant-binding protein 45-like             | <b>-811.93</b> | -             | -0.78    |
| AAEL000837 | 5566897 | general odorant-binding protein 45-like             | <b>-883.73</b> | -1.01         | 2.67     |
| AAEL000701 | 5565919 | 39S ribosomal protein L4, mitochondrial             | 1.25           | <b>438.21</b> | -        |
| AAEL015019 | 5565969 | protein artichoke                                   | -1.43          | <b>42.54</b>  | 1.31     |
| DEFD       | 5579095 | defensin-A-like                                     | -8.11          | <b>31.28</b>  | -4.25    |
| AAEL014386 | 5564283 | serine protease easter                              | -2.06          | <b>30.31</b>  | 2.23     |
| DEFA_AEDAE | 5579099 | defensin-A                                          | -7.35          | <b>21.99</b>  | -4.45    |
| AAEL015430 | 5579444 | serine protease, putative                           | -1.19          | <b>21.79</b>  | -1.05    |
| AAEL015639 | 5579270 | transferrin                                         | -3.55          | <b>19.09</b>  | -1.67    |
| AAEL014005 | 5579131 | clip-domain serine protease, putative               | -2.03          | <b>17.69</b>  | 1.47     |
| CTLMA15    | 5563672 | C-type lectin 37Da                                  | -1.1           | <b>16.19</b>  | 3.91     |

|            |         |                                             |         |                |               |
|------------|---------|---------------------------------------------|---------|----------------|---------------|
| TRY5_AEDAE | 5578510 | trypsin 5G1                                 | -1.15   | <b>15.52</b>   | 2.13          |
| DEFC_AEDAE | 5579094 | defensin-C                                  | -8.23   | <b>14.5</b>    | -5.59         |
| AAEL013640 | 5578322 | lung carbonyl reductase                     | 3.51    | <b>13.7</b>    | 1.49          |
| AAEL010429 | 5573346 | protein G12                                 | 5.92    | <b>13.51</b>   | 25.07         |
| AAEL002726 | 5575756 | 37 kDa salivary gland allergen Aed a 2-like | 1.09    | <b>12.19</b>   | 1.63          |
| AAEL015458 | 5579417 | transferrin                                 | -9.02   | <b>11.93</b>   | -1.19         |
| AAEL013542 | 5578161 | elongation of very long chain fatty acids   | -1.65   | <b>11.85</b>   | 2.91          |
| AAEL002672 | 5575549 | matrix metalloproteinase-19                 | -1.25   | <b>11.49</b>   | 1.36          |
| AAEL013990 | 5579047 | hexamerin-1.1                               | -1.16   | <b>10.97</b>   | 1.96          |
| AAEL005787 | 5567041 | serine protease easter                      | -1.05   | <b>10.3</b>    | 1.72          |
| AAEL015628 | 5579281 | glycine dehydrogenase                       | 2.92    | <b>10.07</b>   | 1.84          |
| AAEL004134 | 5564162 | lupus la ribonucleoprotein                  | 2.24    | <b>-69.95</b>  | -2.86         |
| AAEL003946 | 5563782 | 28S ribosomal protein S33, mitochondrial    | -2.19   | <b>-101.56</b> | 1.57          |
| AAEL009497 | 5572080 | probable phosphomannomutase                 | -1.25   | <b>-676.56</b> | -3.51         |
| AAEL015052 | 5566038 | steroid receptor RNA activator 1            | -358.45 | 3.11           | <b>212.47</b> |
| AAEL010429 | 5573346 | protein G12                                 | 5.92    | 13.51          | <b>25.07</b>  |
| AAEL009435 | 5571953 | adhesion regulating molecule 1              | -1.34   | -1.21          | <b>13.51</b>  |
| AAEL002613 | 5575308 | peritrophin-48                              | 3.23    | -3.98          | <b>11.35</b>  |
| ATT        | 5578028 | attacin-B                                   | 4.4     | -1.42          | <b>-10.49</b> |
| AAEL007040 | 5568687 | protein lozenge, transcript variant X3      | -1.83   | 45.7           | <b>-12.57</b> |
| AAEL011550 | 5574942 | seminal metalloprotease 1                   | -1.93   | 1.71           | <b>-22.18</b> |
| CUSOD3_a   | 5573744 | superoxide dismutase [Cu-Zn]                | 1.03    | 1.18           | <b>-39.11</b> |

### Day 2

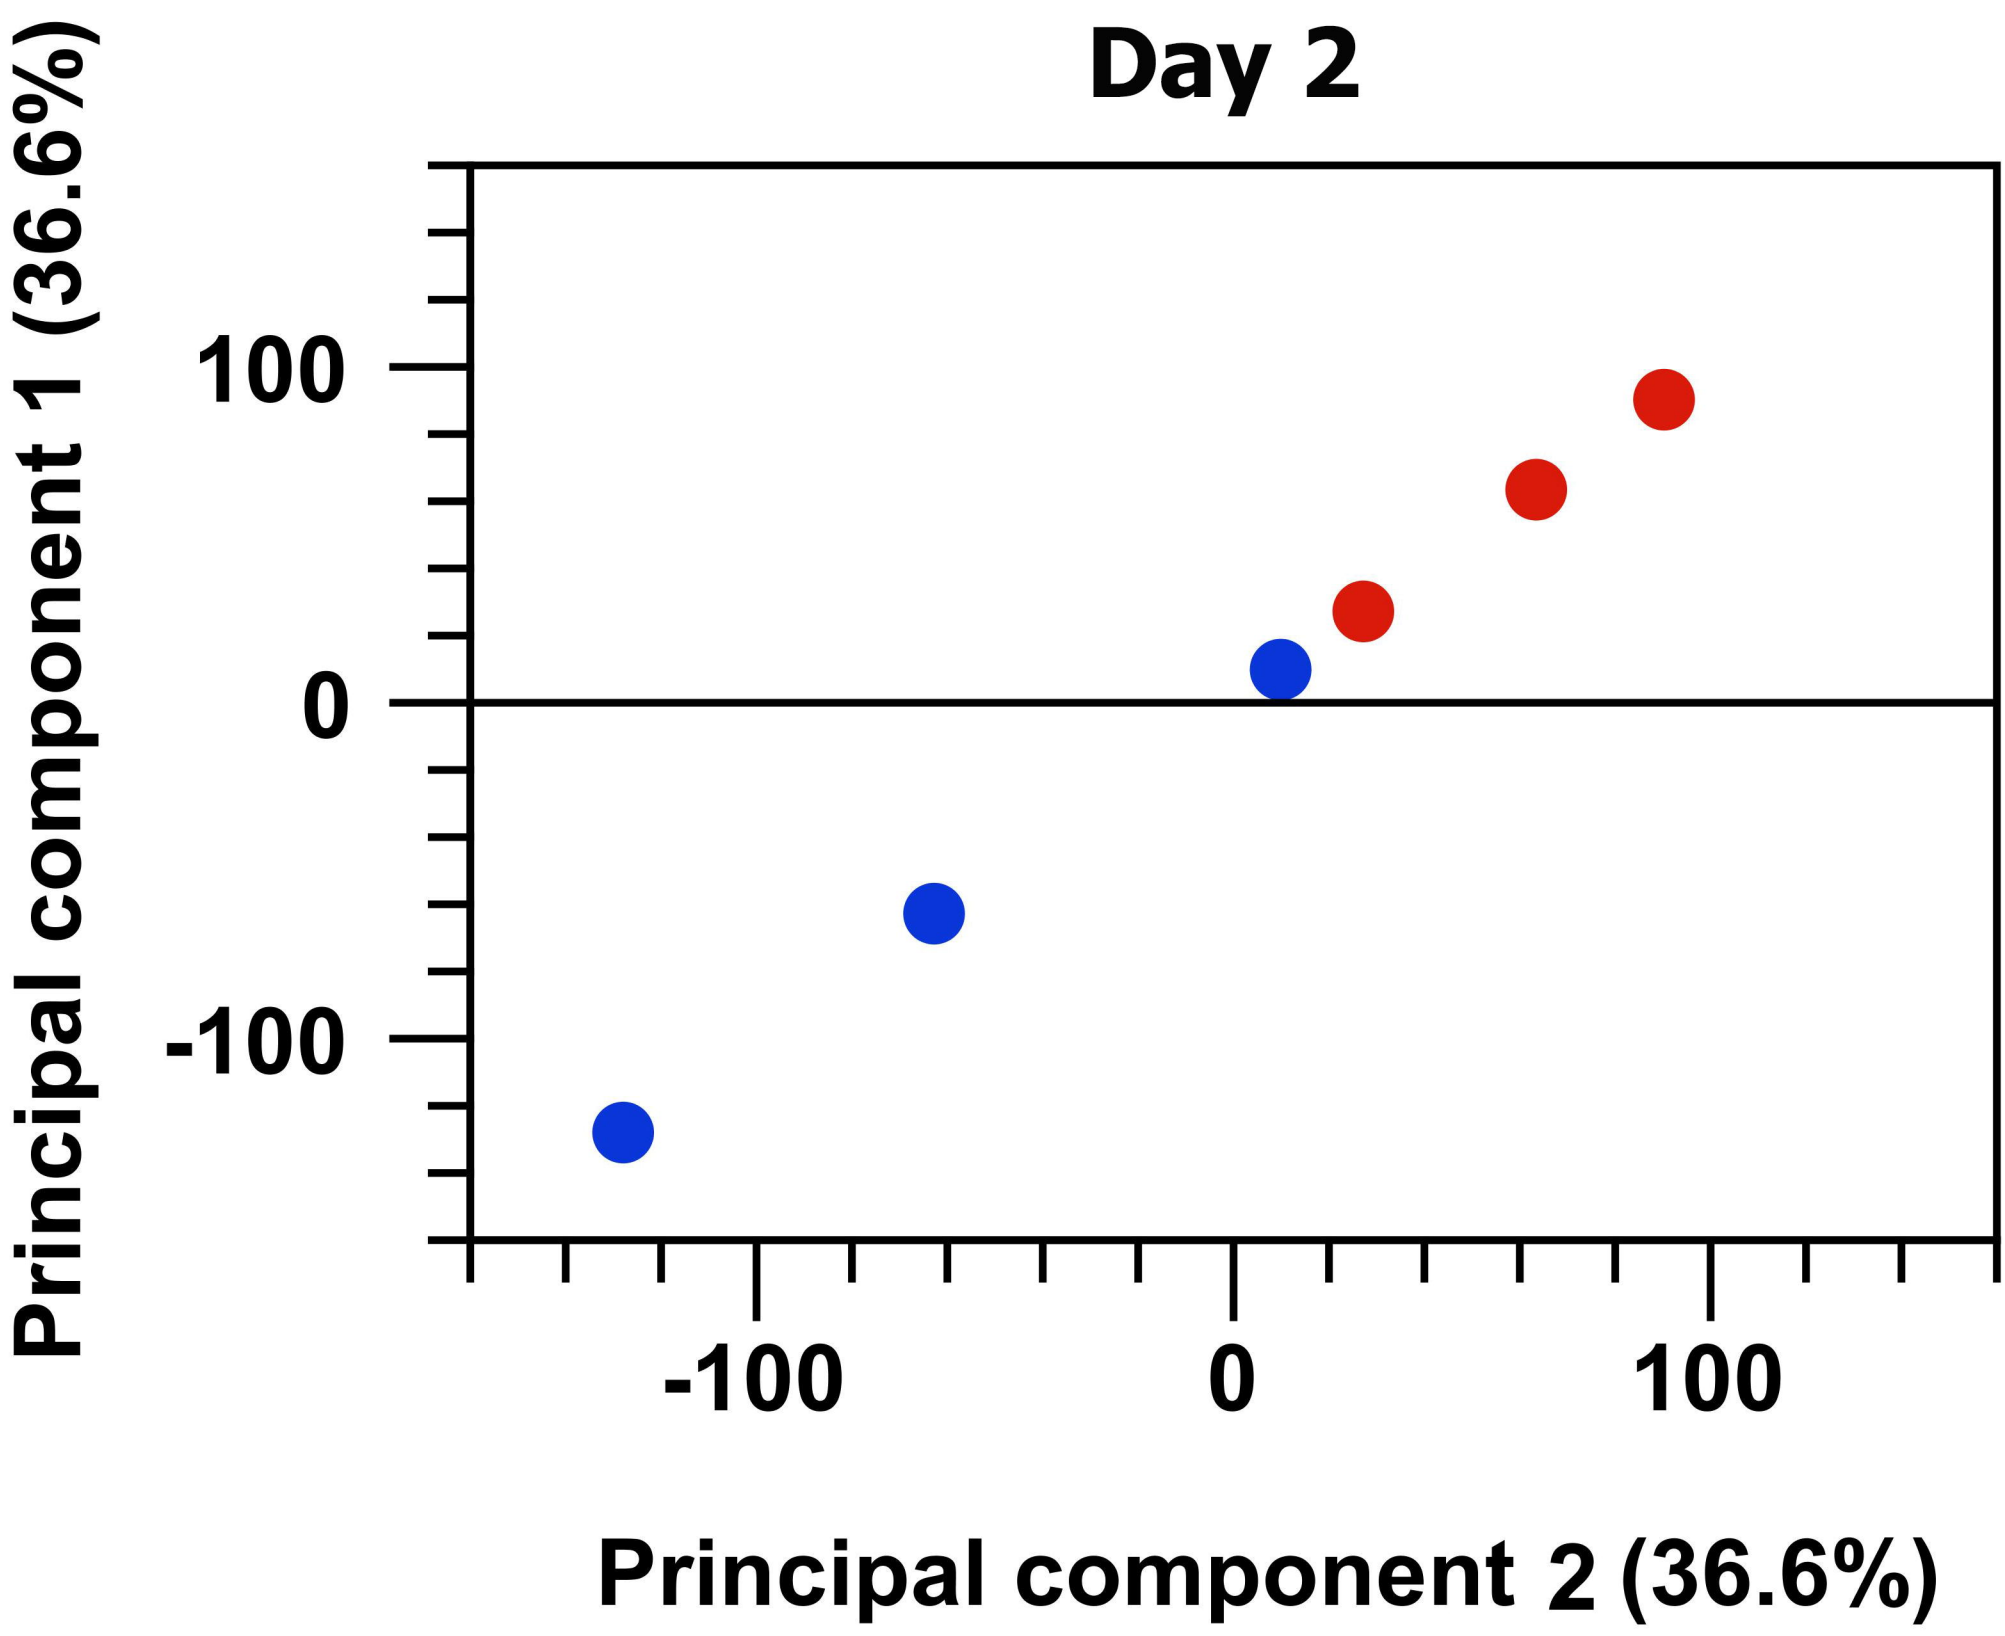

### Day 7

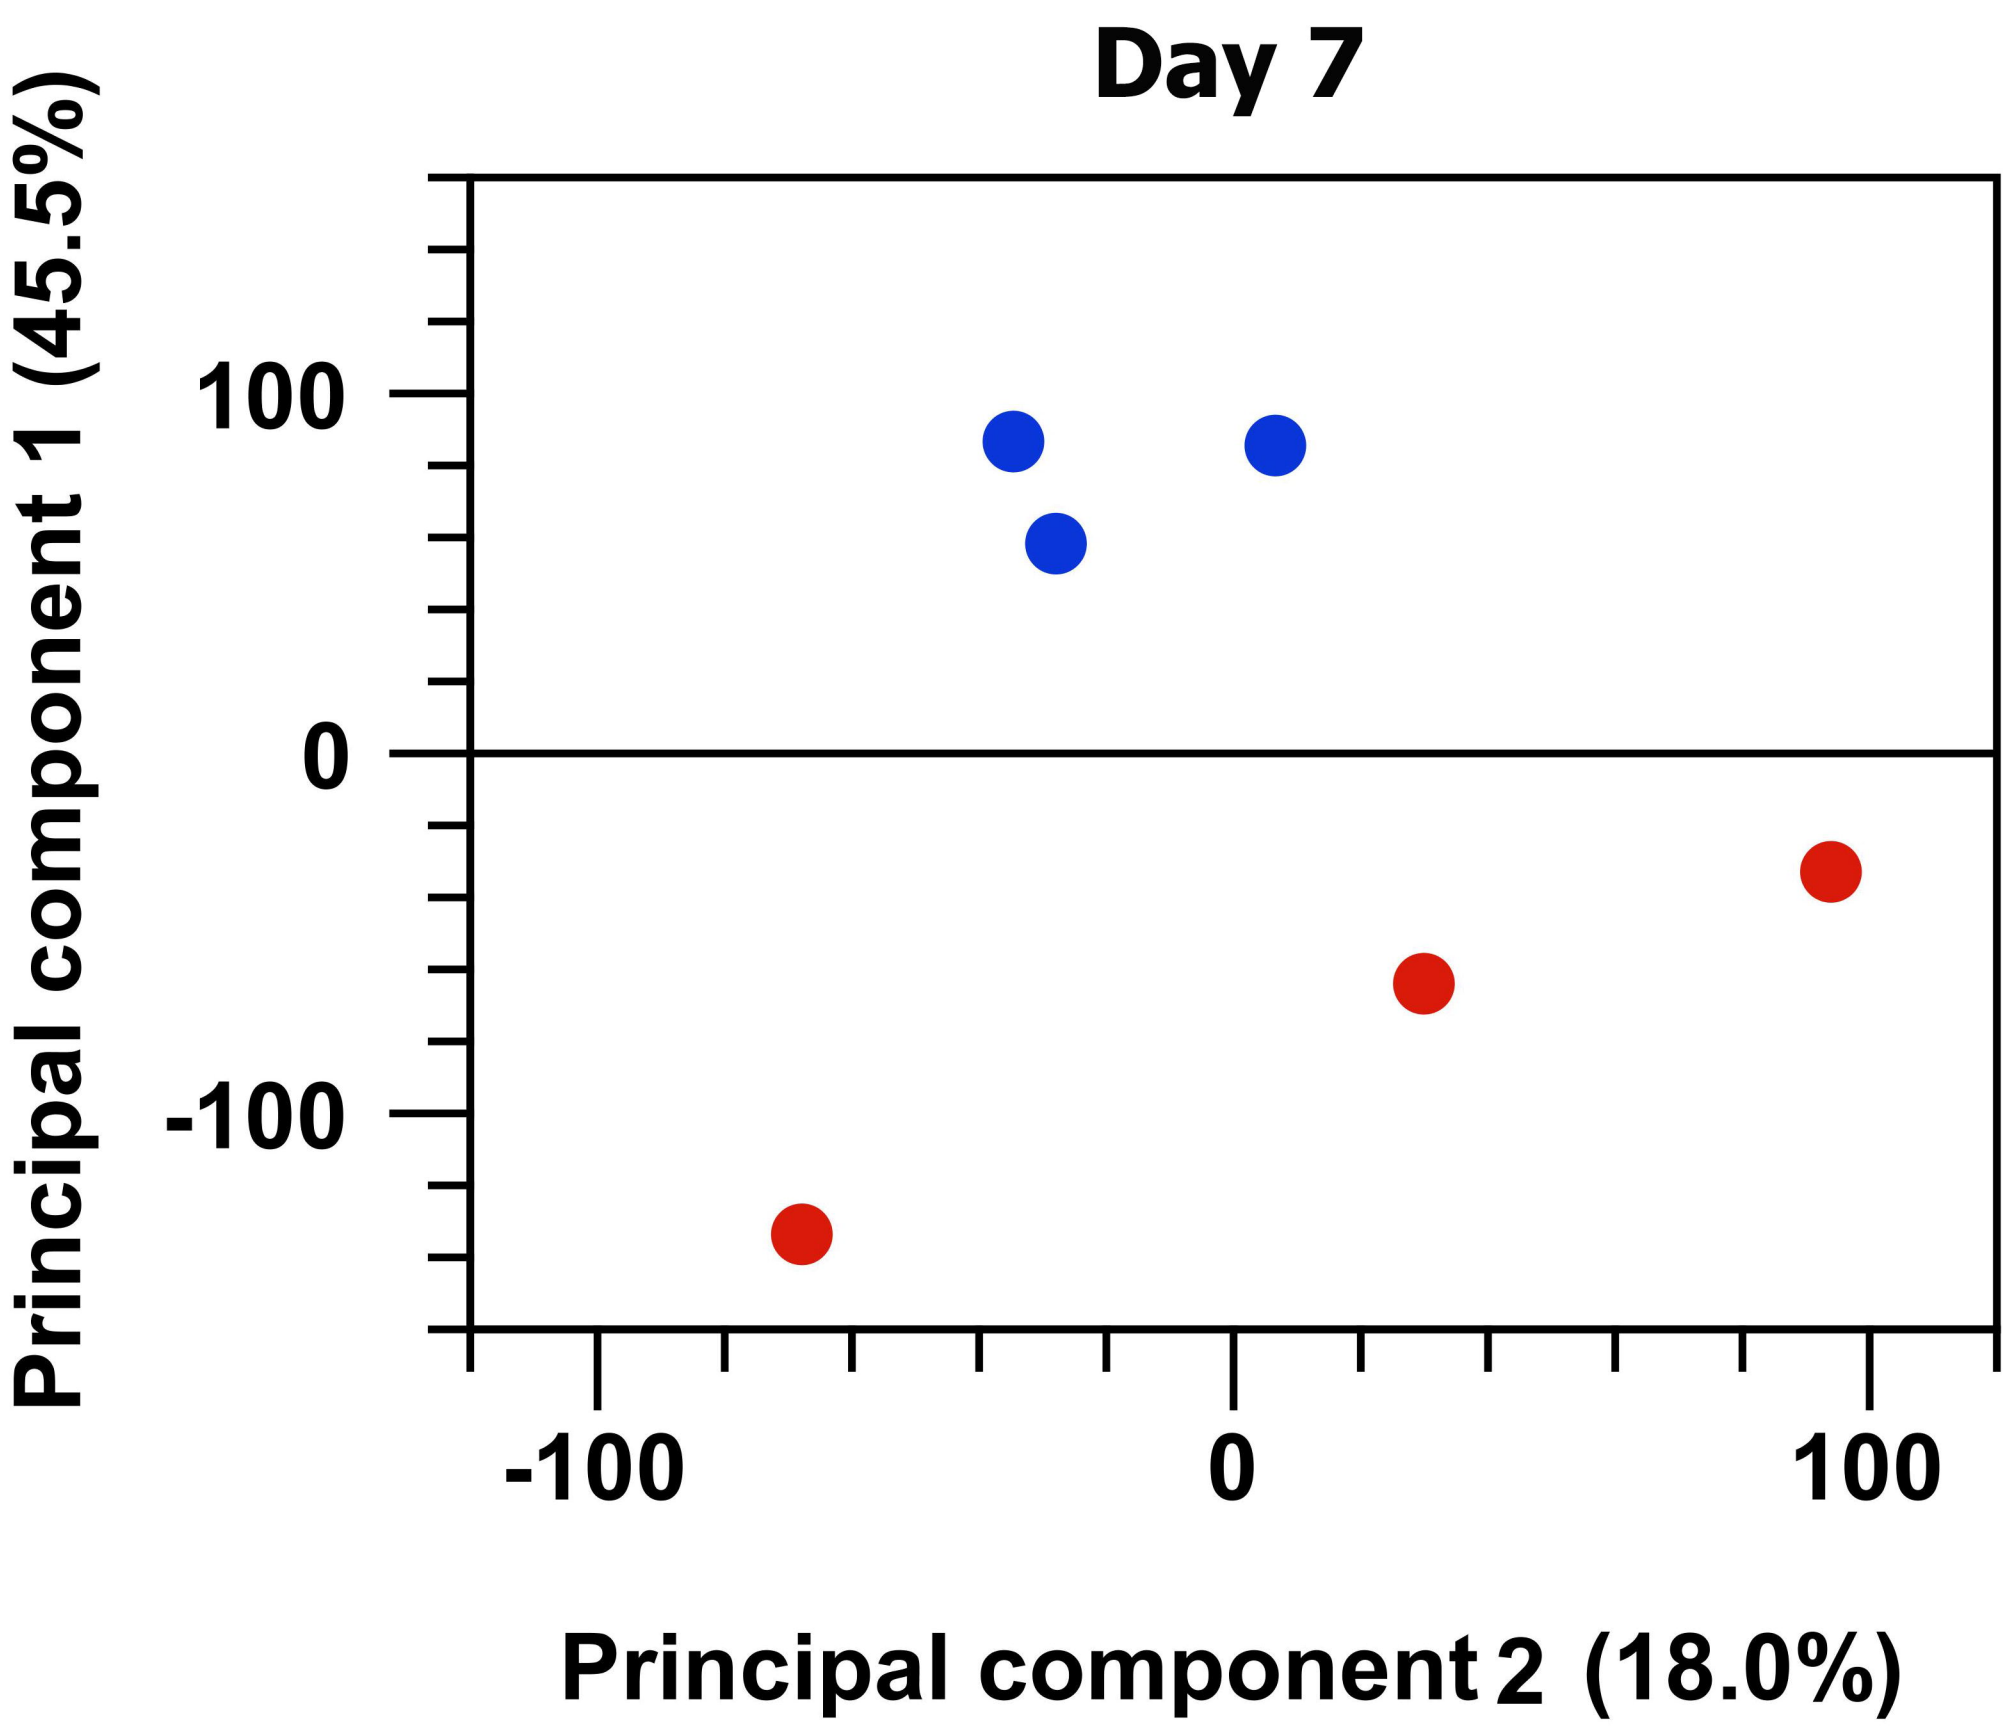

bioRxiv preprint doi: <https://doi.org/10.1101/179416>; this version posted August 22, 2017. The copyright holder has placed this preprint (which was not certified by peer review) in the Public Domain. It is no longer restricted by copyright. Anyone can legally share, reuse, remix, or adapt this material for any purpose without crediting the original authors.

### Day 14

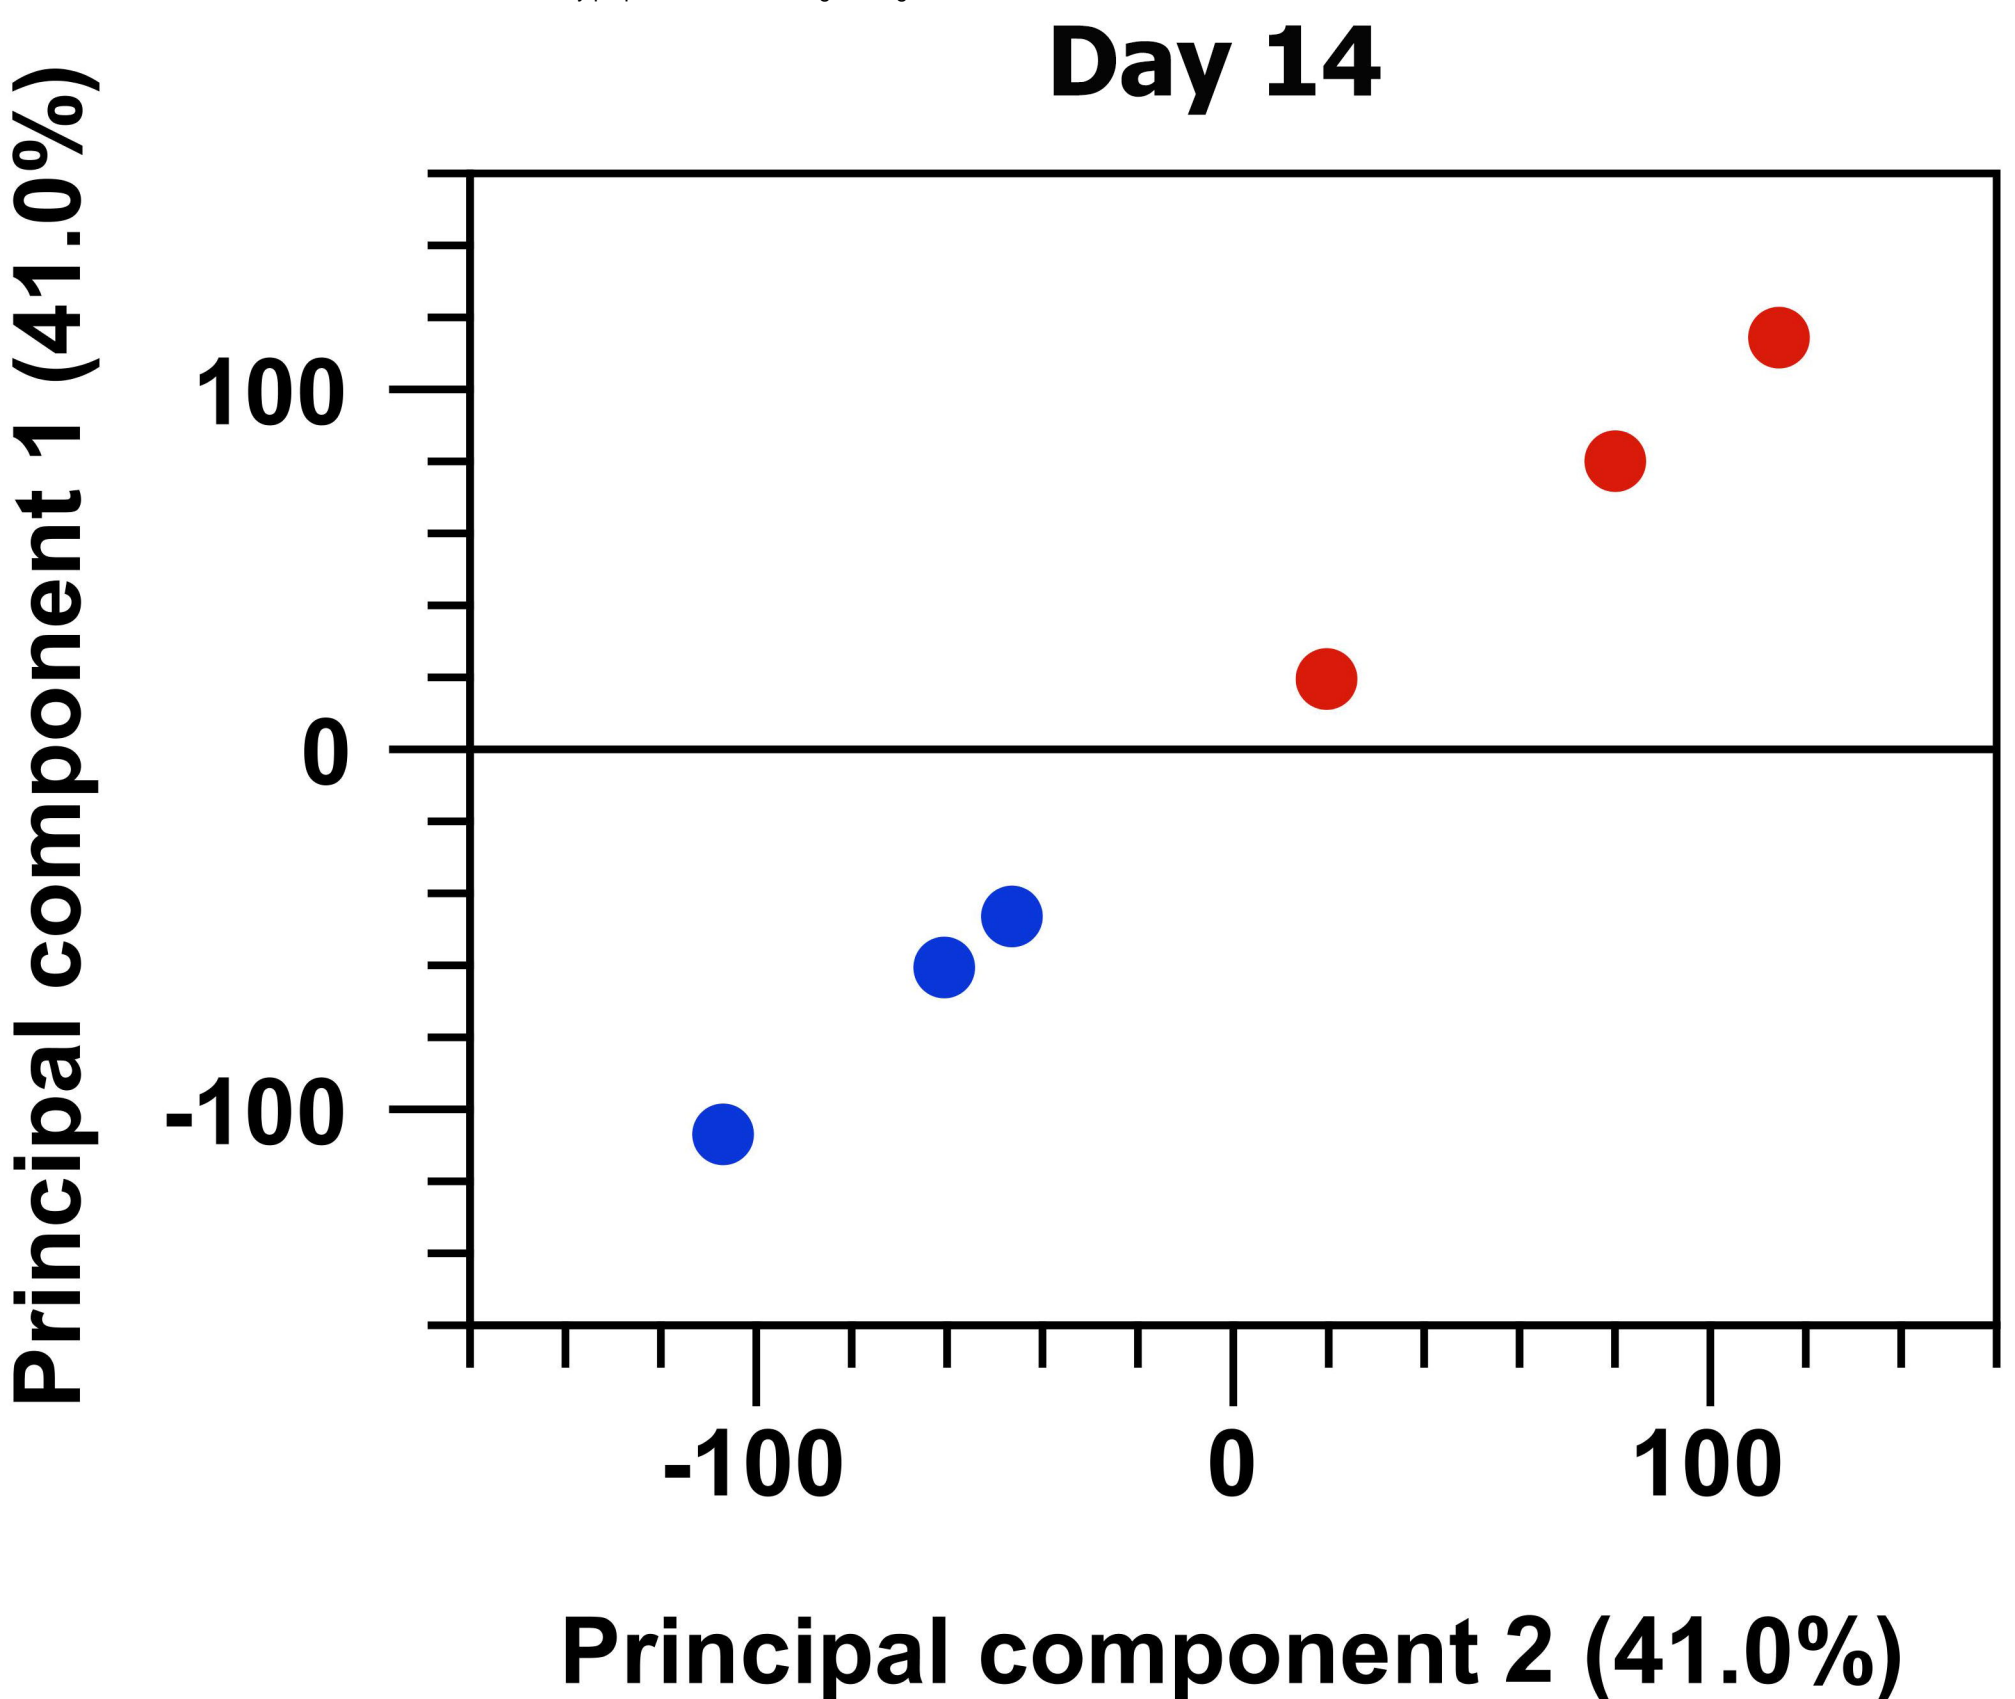

● Control

● ZIKV Infected



**-Log10 (P-Values)**

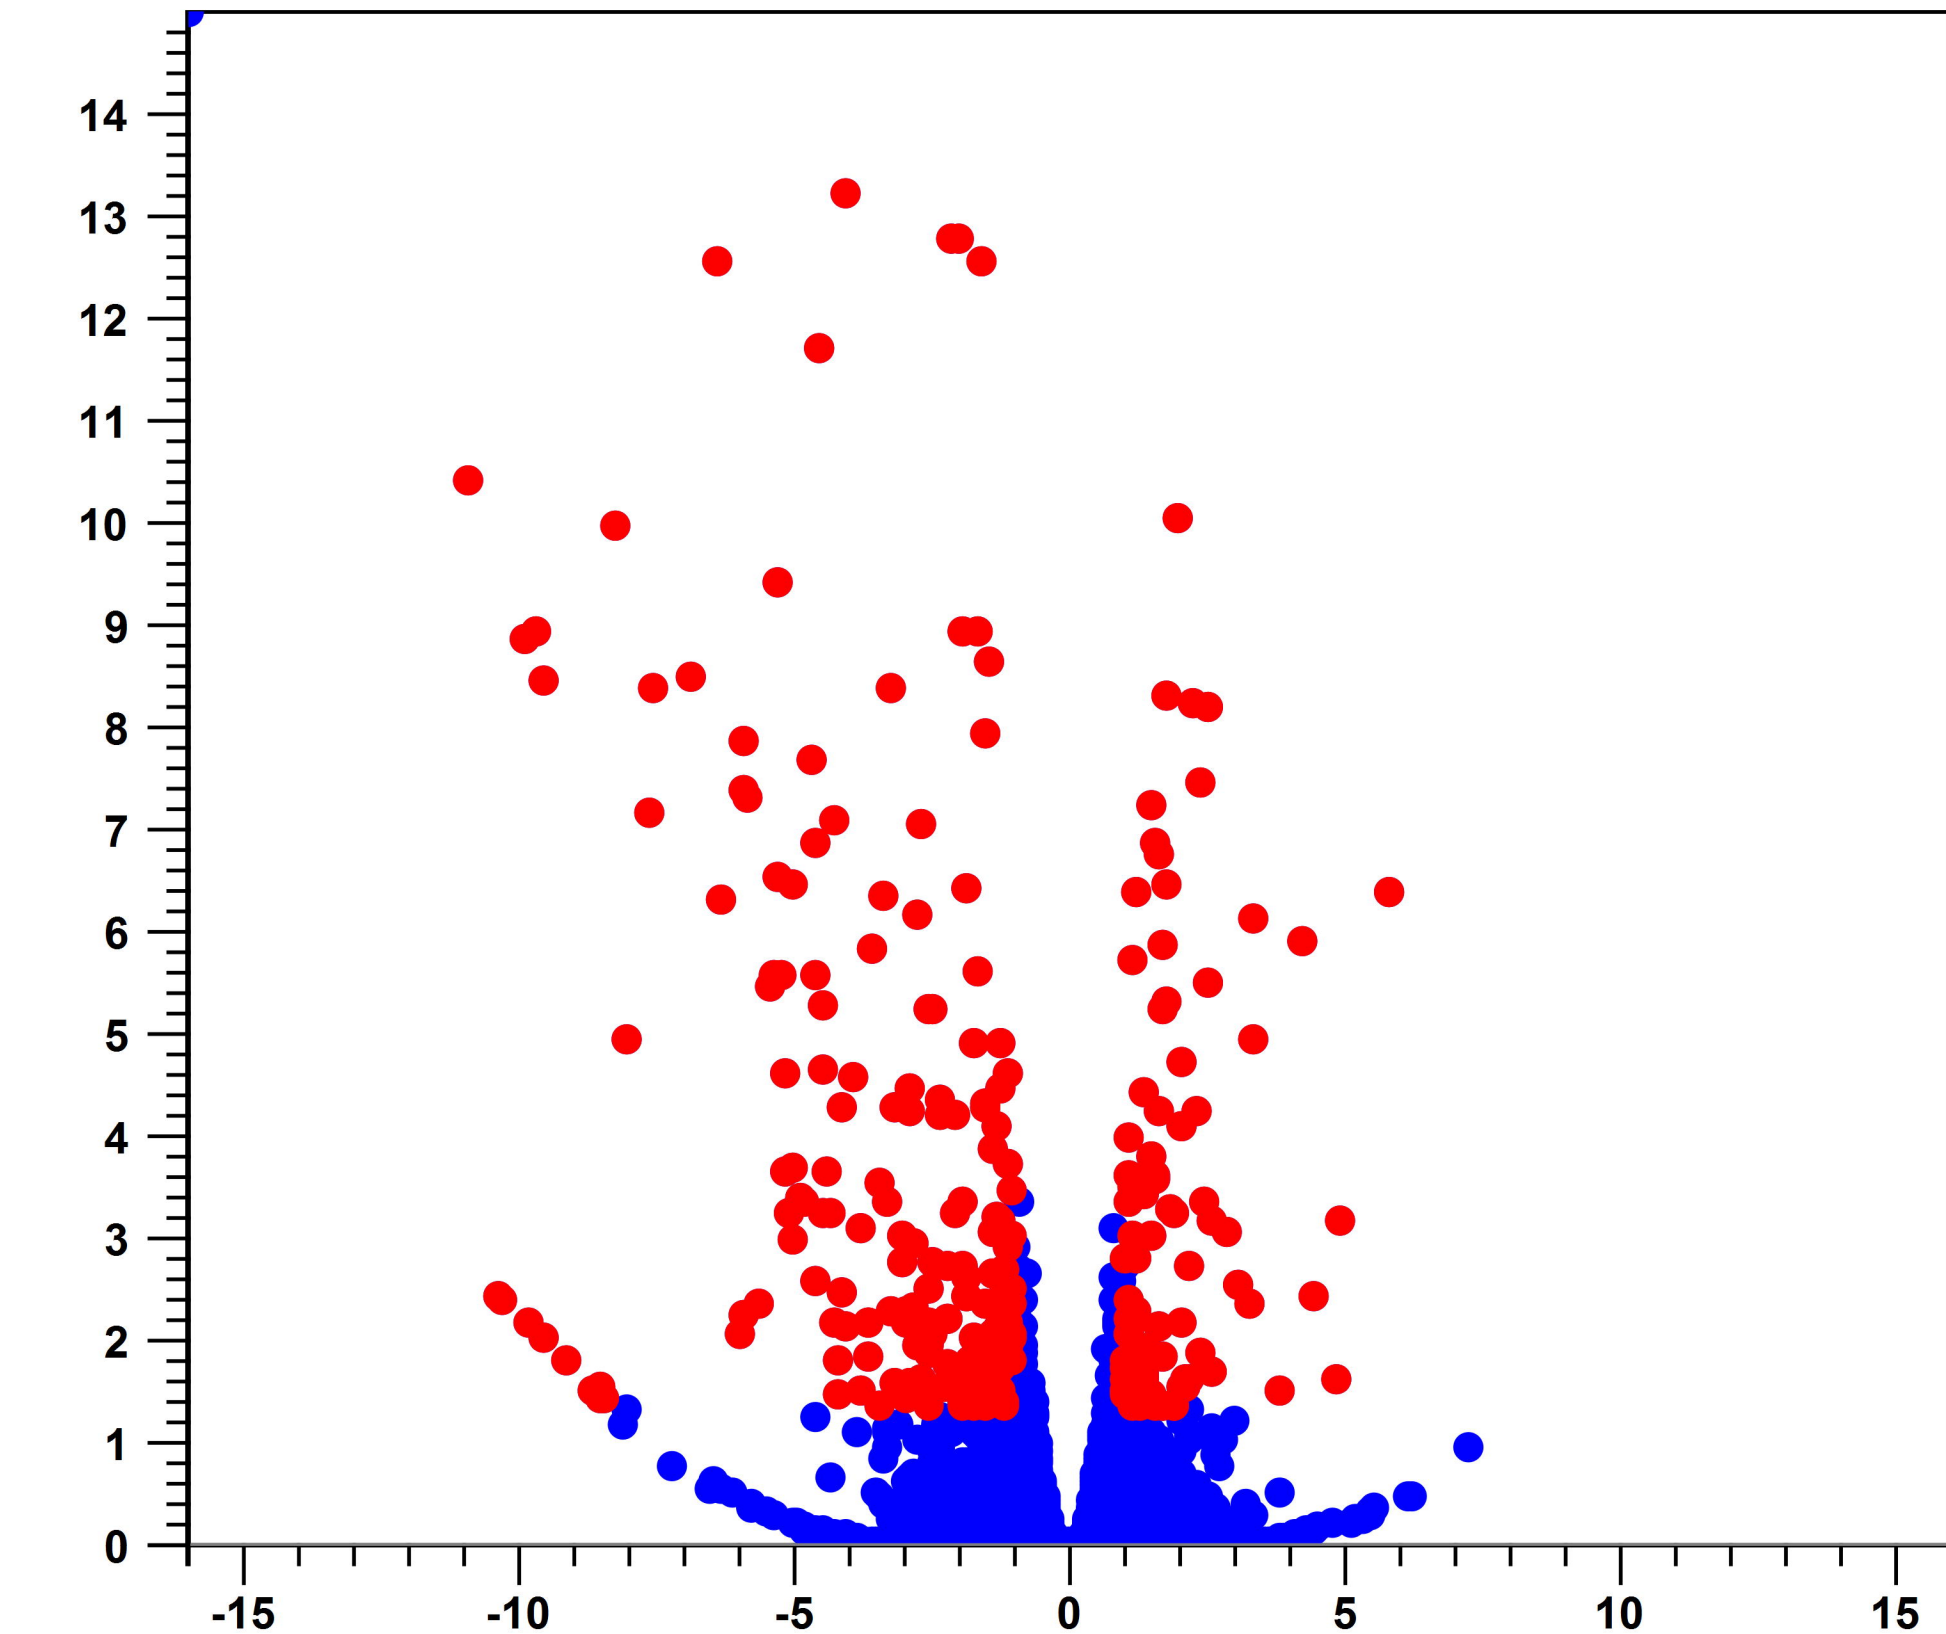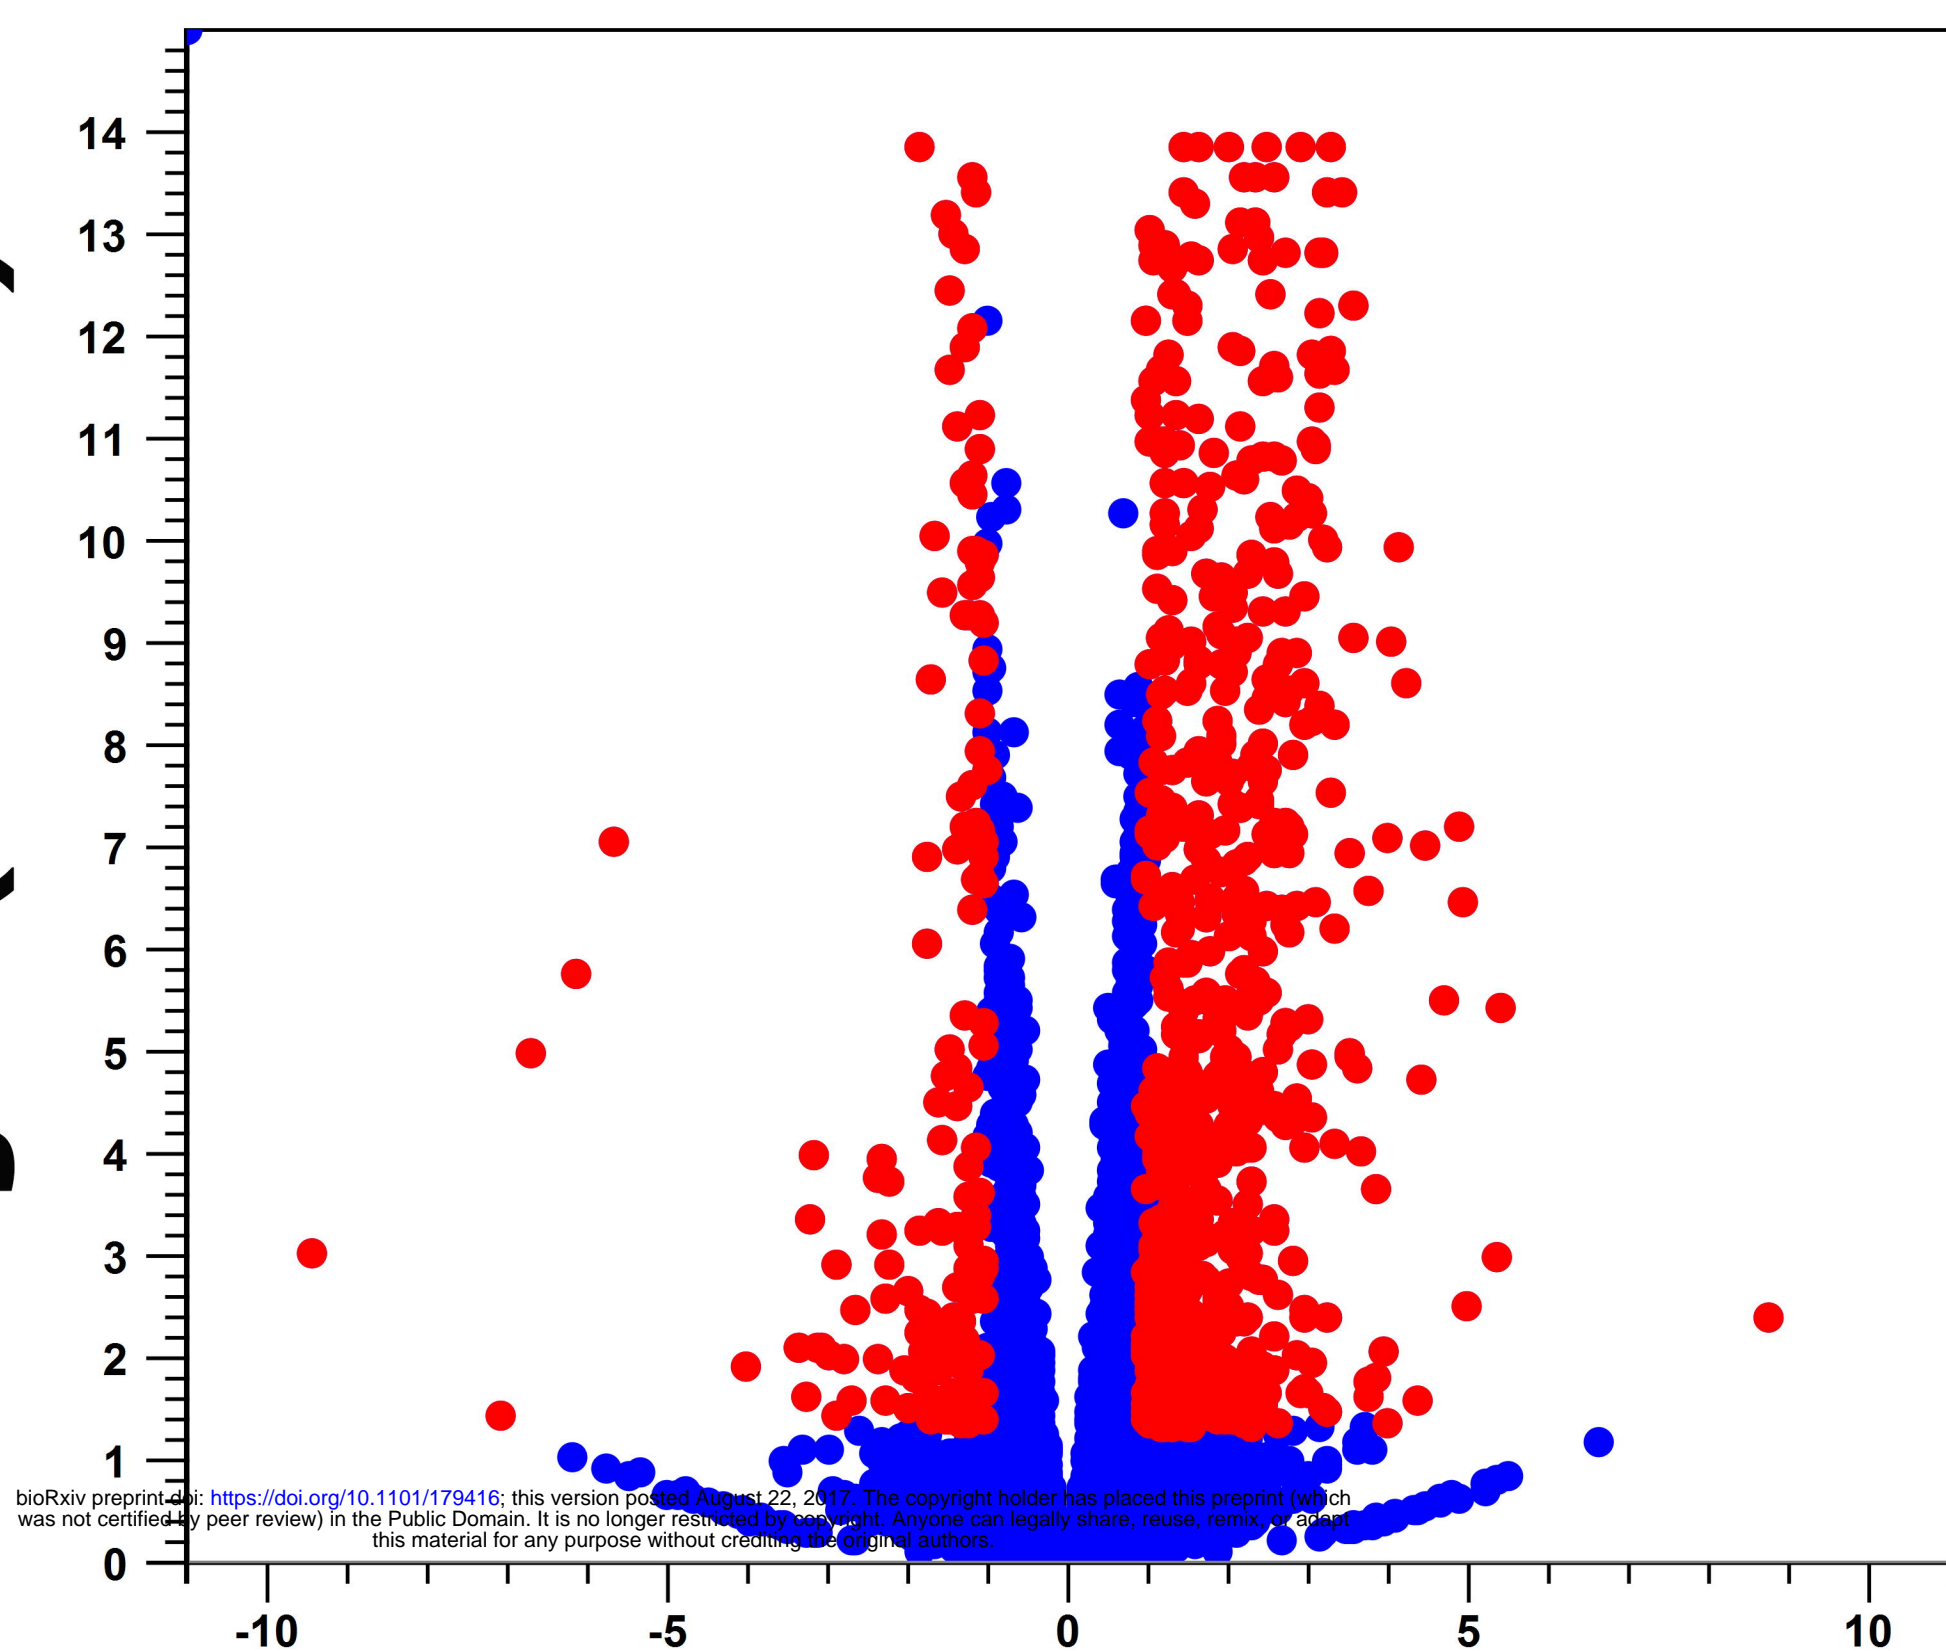

bioRxiv preprint doi: <https://doi.org/10.1101/179416>; this version posted August 22, 2017. The copyright holder has placed this preprint (which was not certified by peer review) in the Public Domain. It is no longer restricted by copyright. Anyone can legally share, reuse, remix, or adapt this material for any purpose without crediting the original authors.

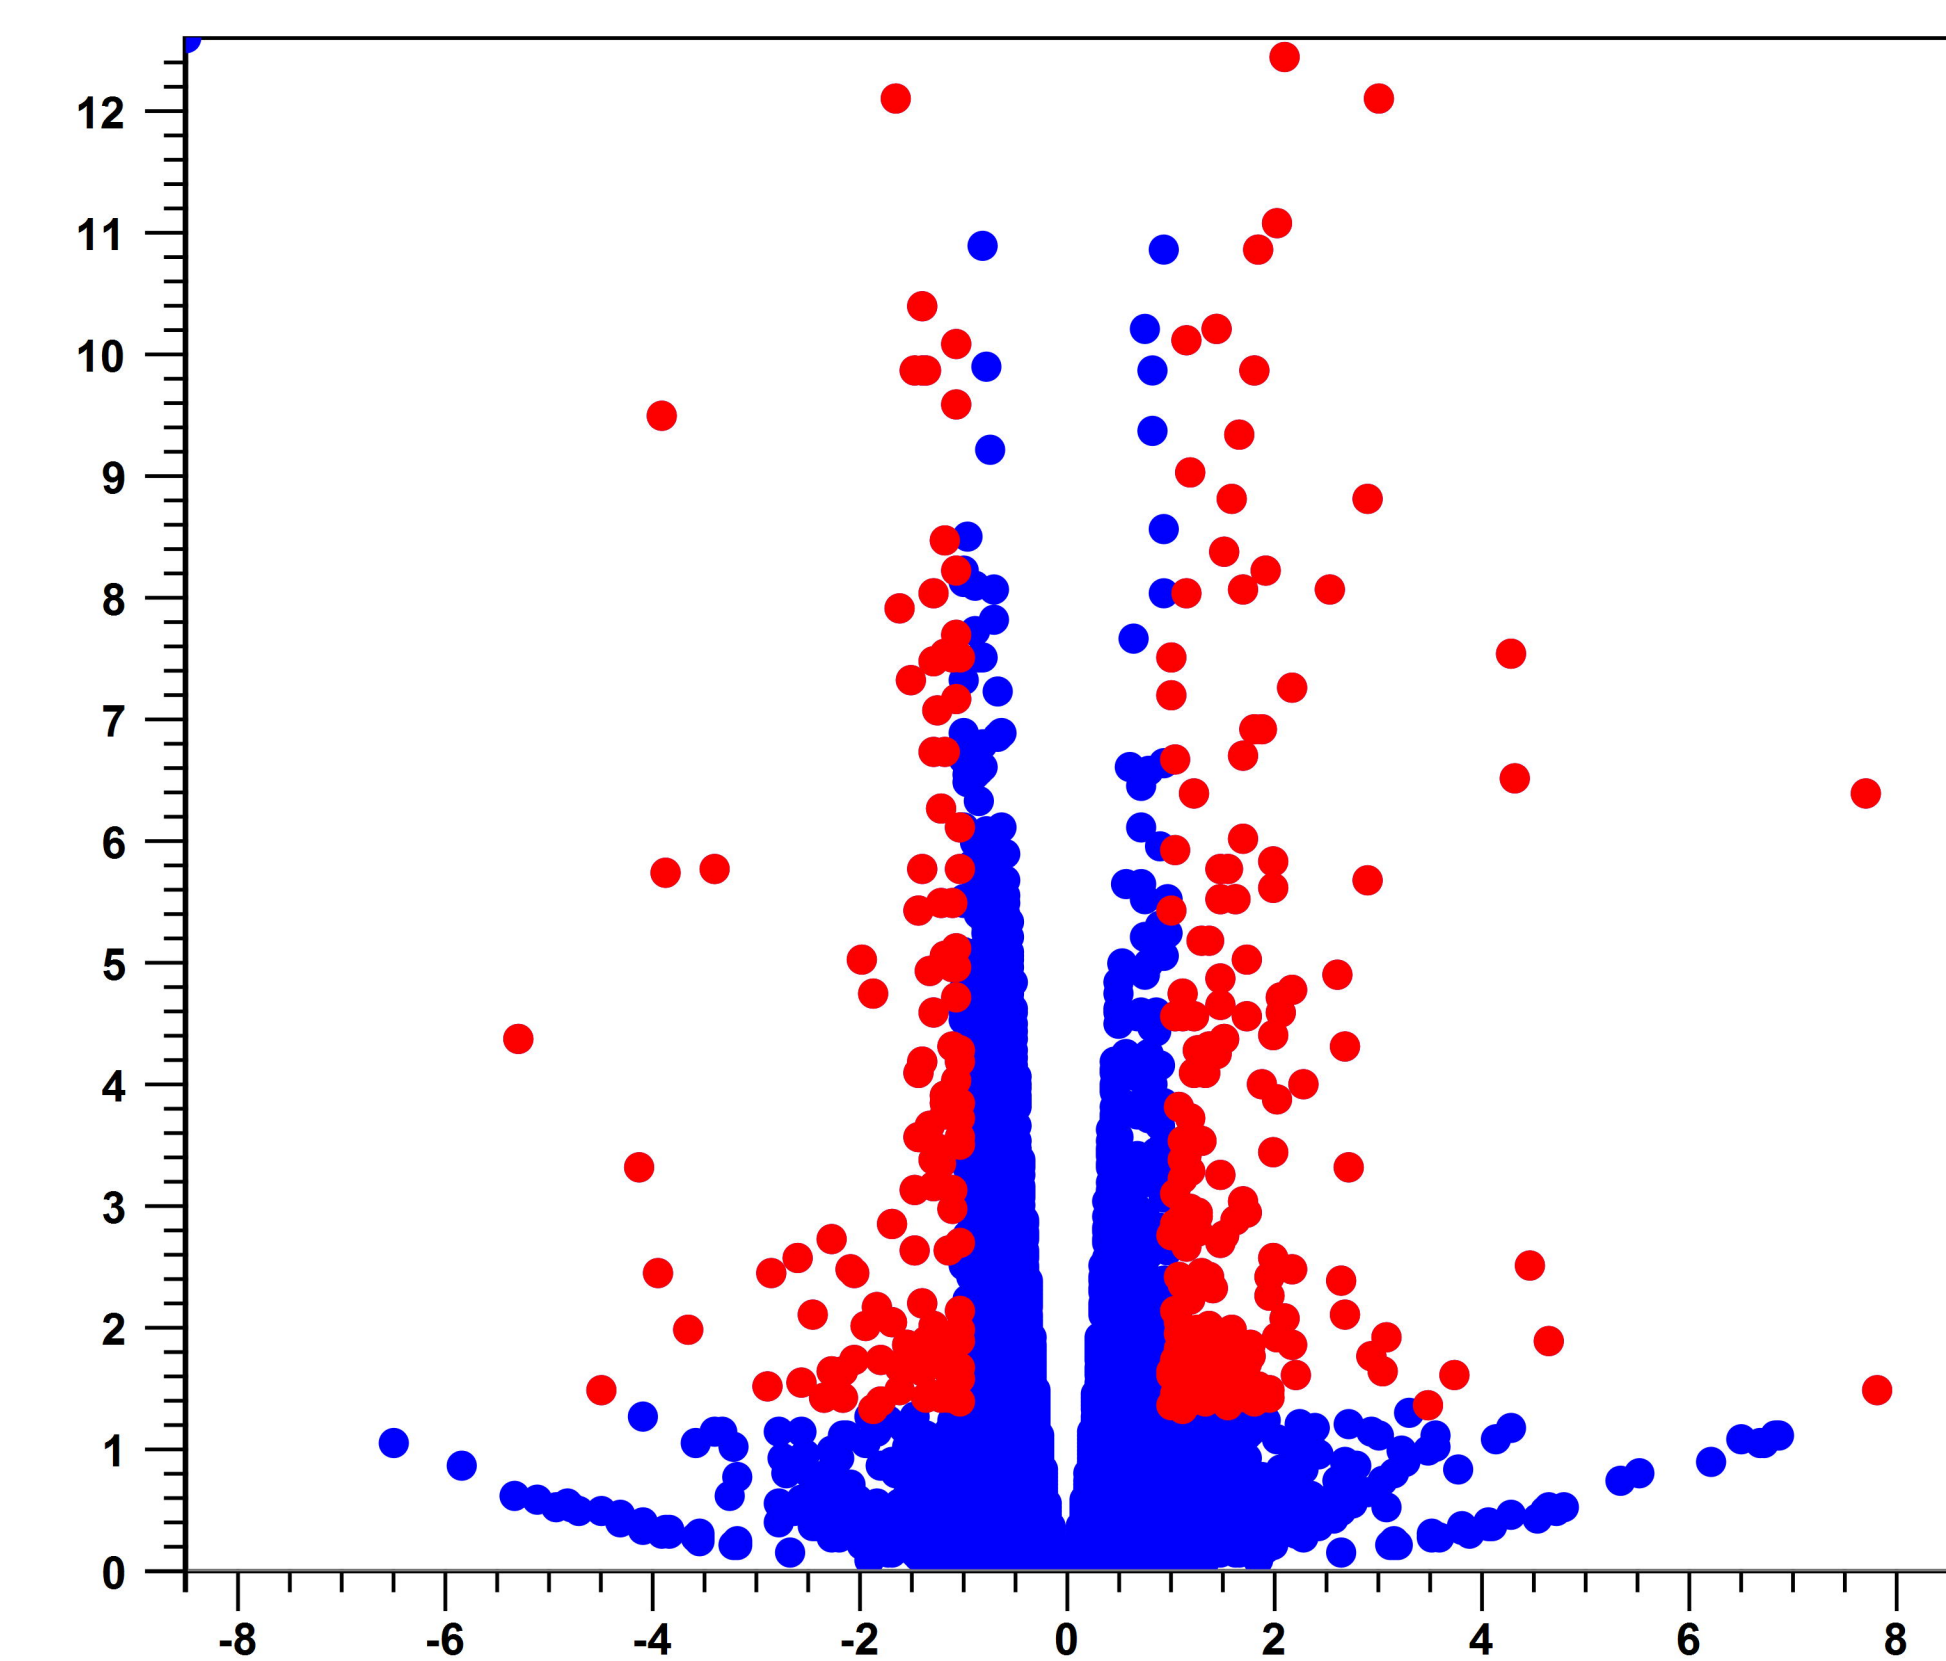

**Log2 Fold Change**

**Day 14 (303)**

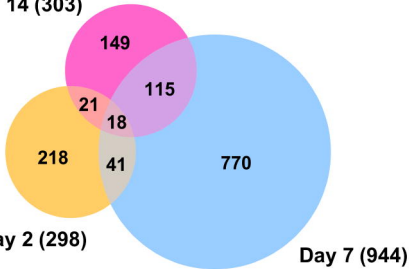

**Day 2 (298)**

**Day 7 (944)**

AAEL007416

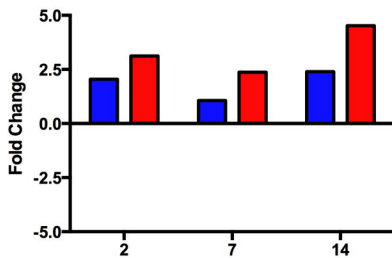

AAEL013338

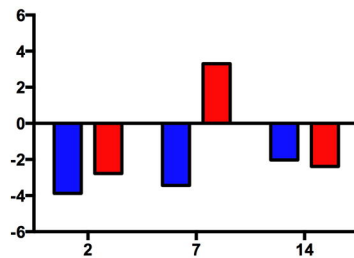

AAEL005090

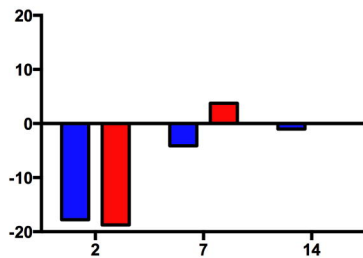

AAEL007040

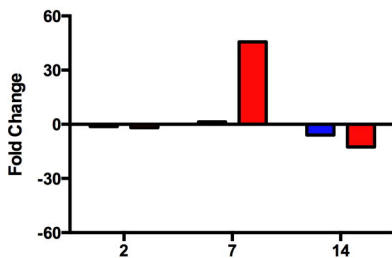

AAEL012339

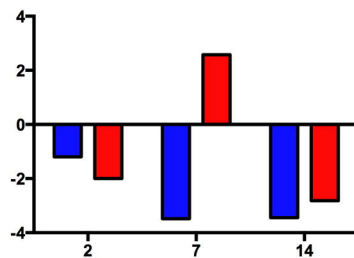

AAEL001693

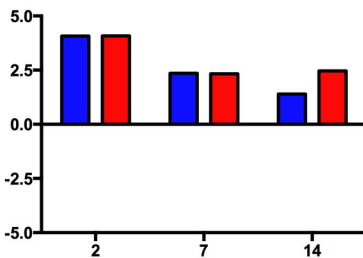

AAEL010228

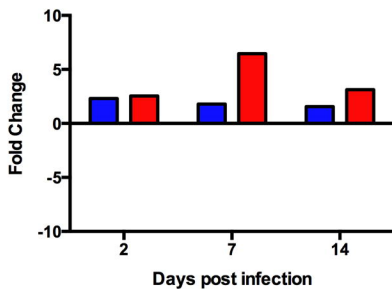

AAEL015458

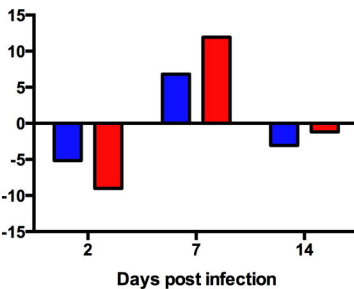

AAEL013602

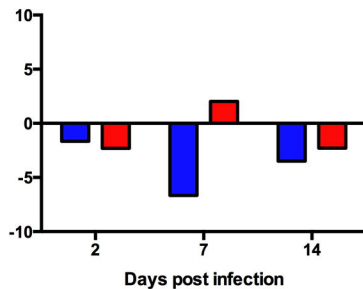

qPCR fold change

Transcriptomics

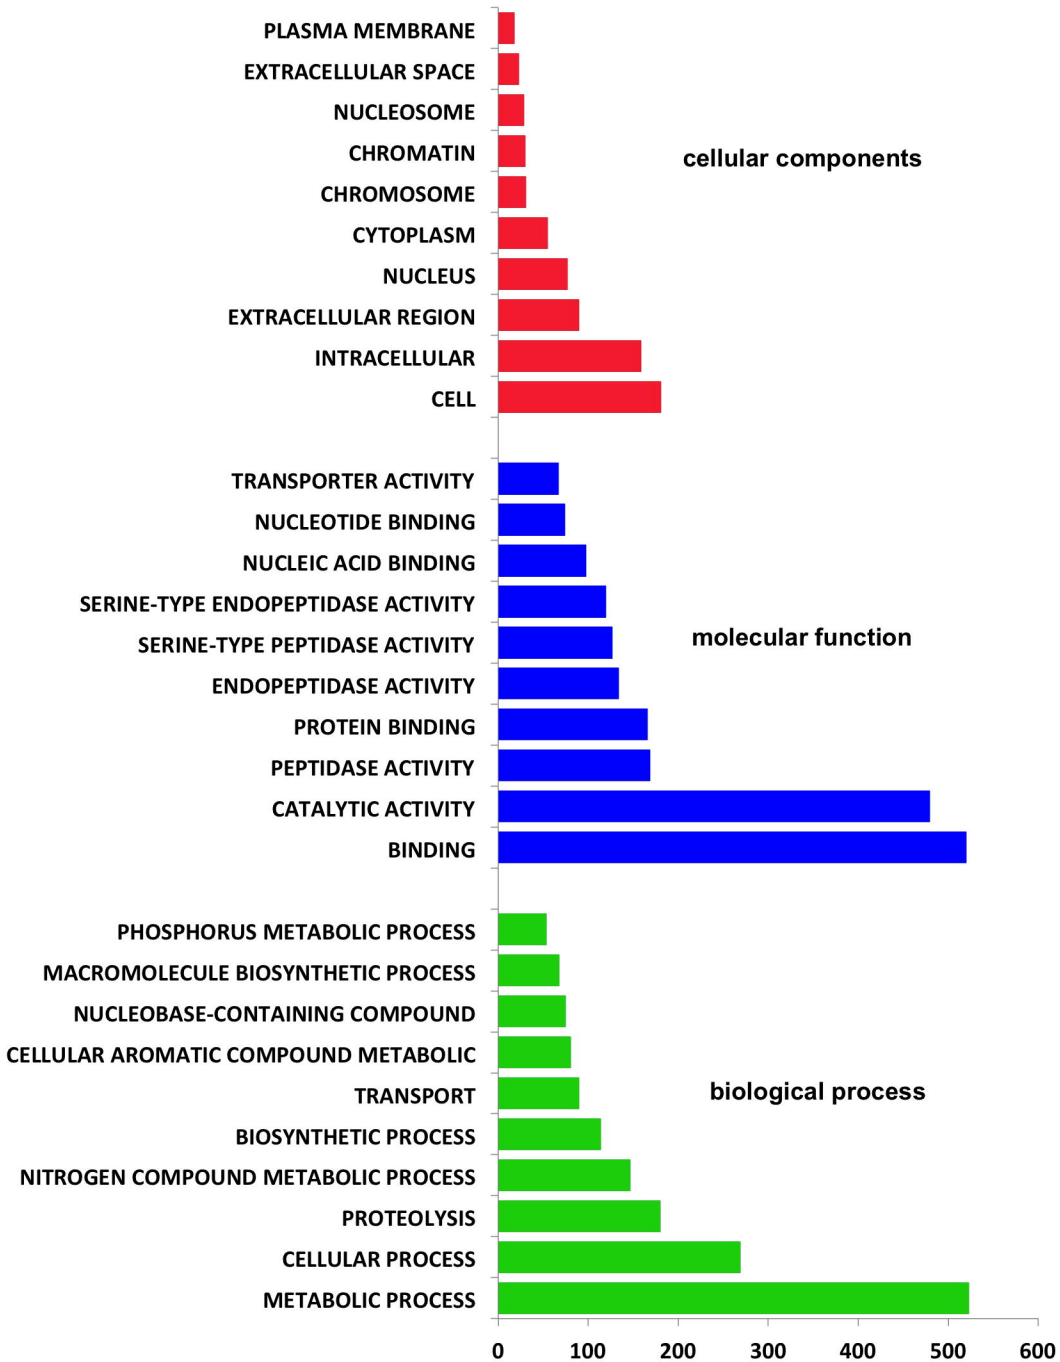

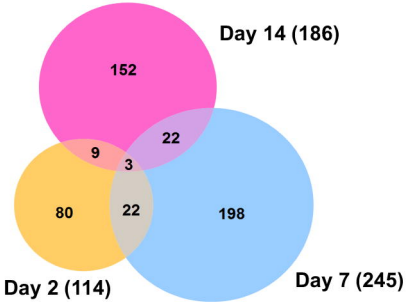

Source: http://www.biorxiv.org/content/10.1101/179416v1.full.pdf
